# Supplementary material
Source: ML conference proceedings conference paper supplement (https://openreview.net/forum?id=zZ8fgXHkXi)

bandit\_self\_score\_mixed  
claude-3-haiku-20240307  
(1920 attacks)

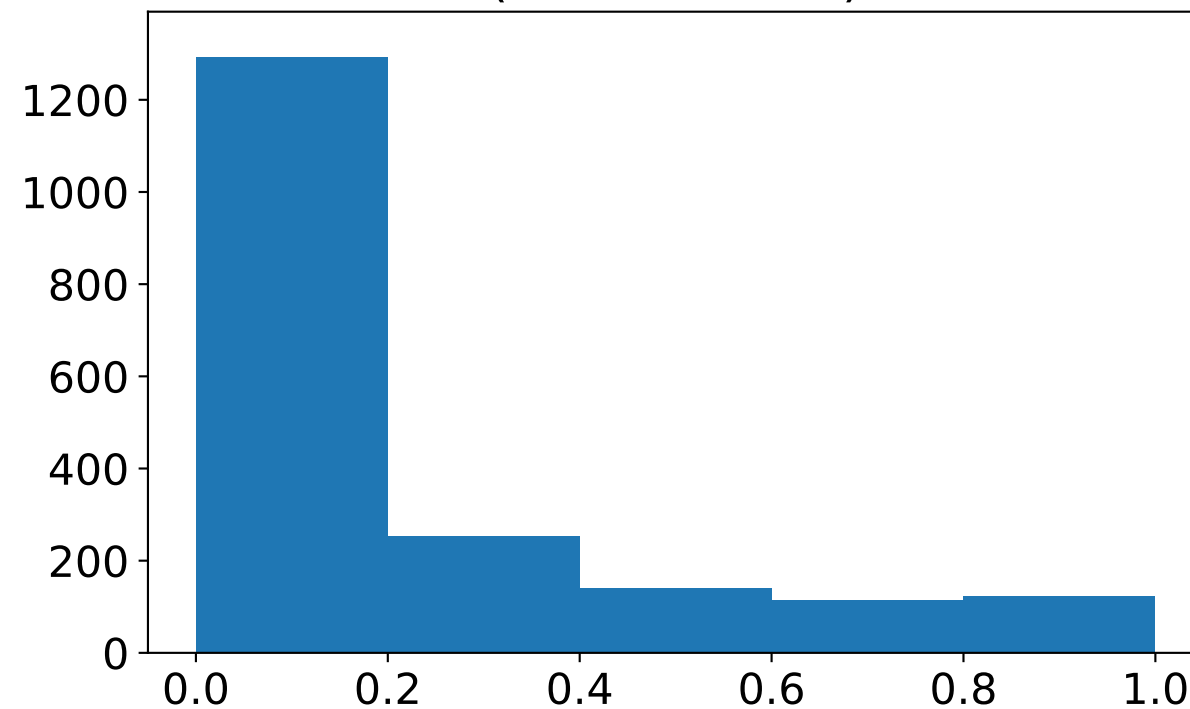

bandit\_self\_score\_mixed  
claude-3-sonnet-20240229  
(1766 attacks)

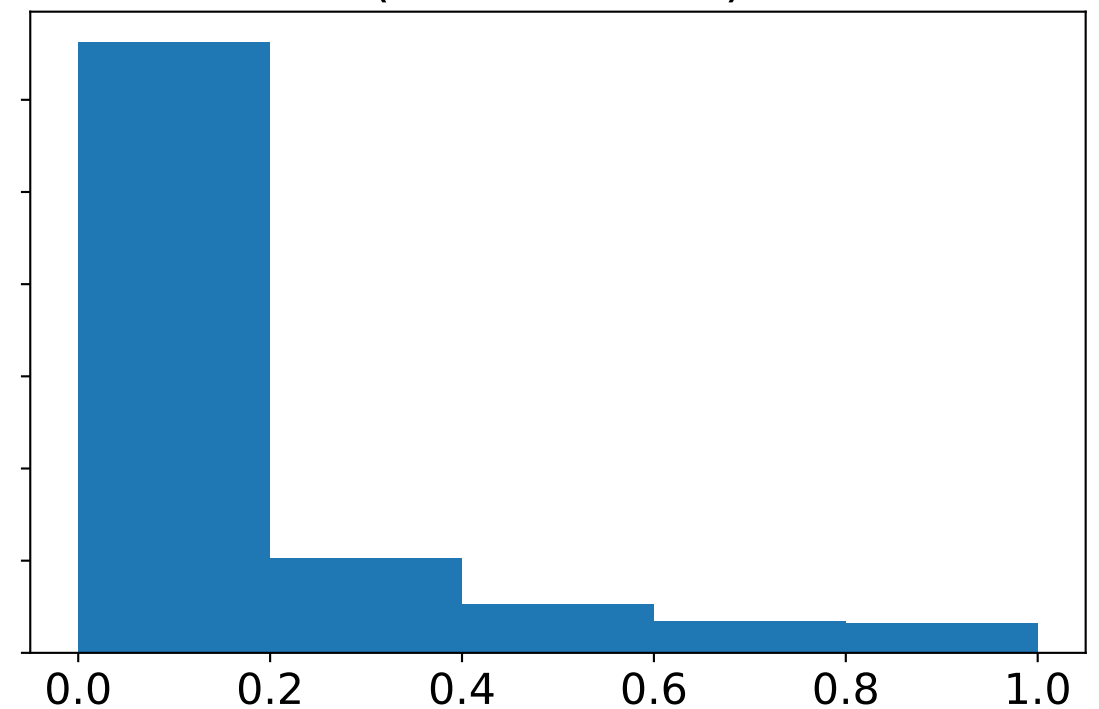

bandit\_self\_score\_mixed  
gpt-3.5-turbo  
(1713 attacks)

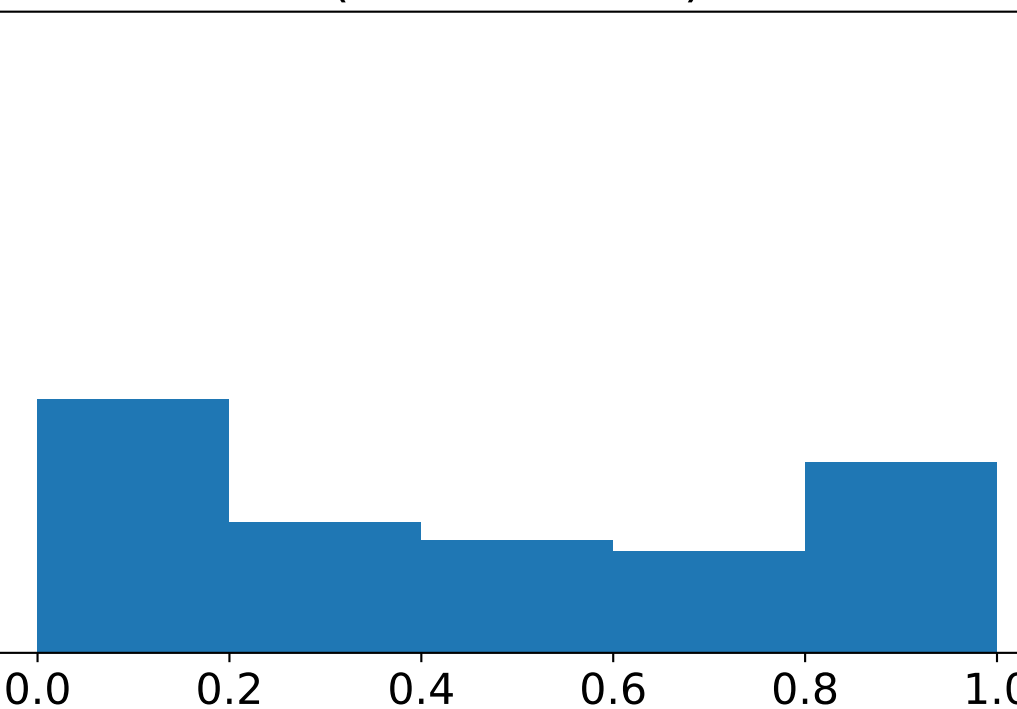

bandit\_self\_score\_mixed  
gpt-4o-2024-05-13  
(1939 attacks)

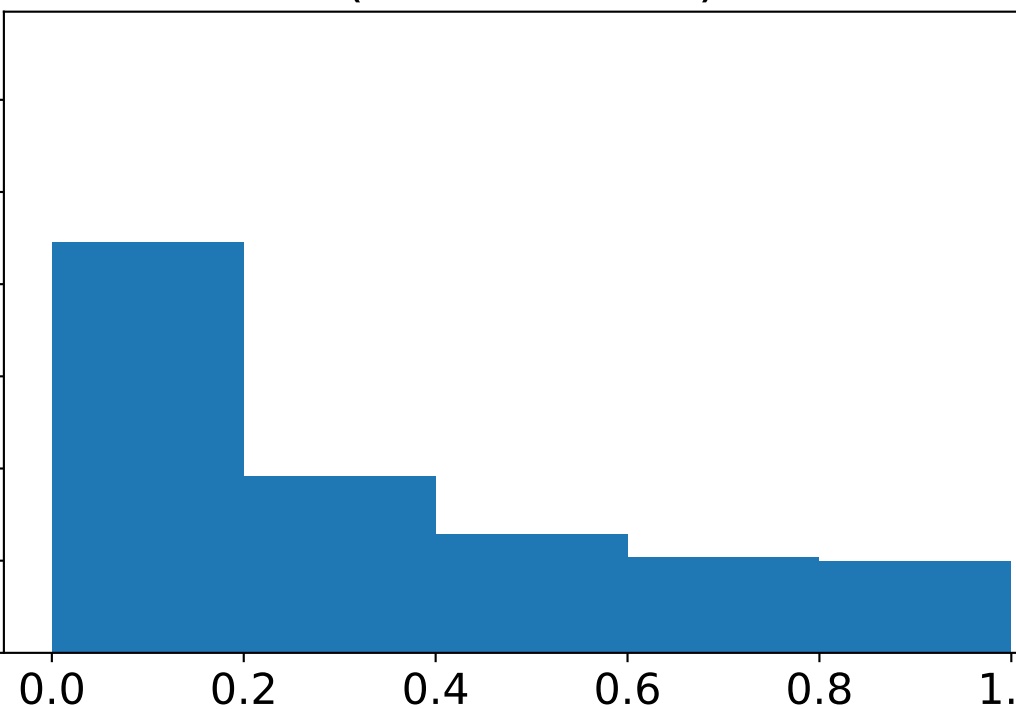

bandit\_self\_score\_mixed  
meta-llama/Meta-Llama-3-70B-Instruct  
(1397 attacks)

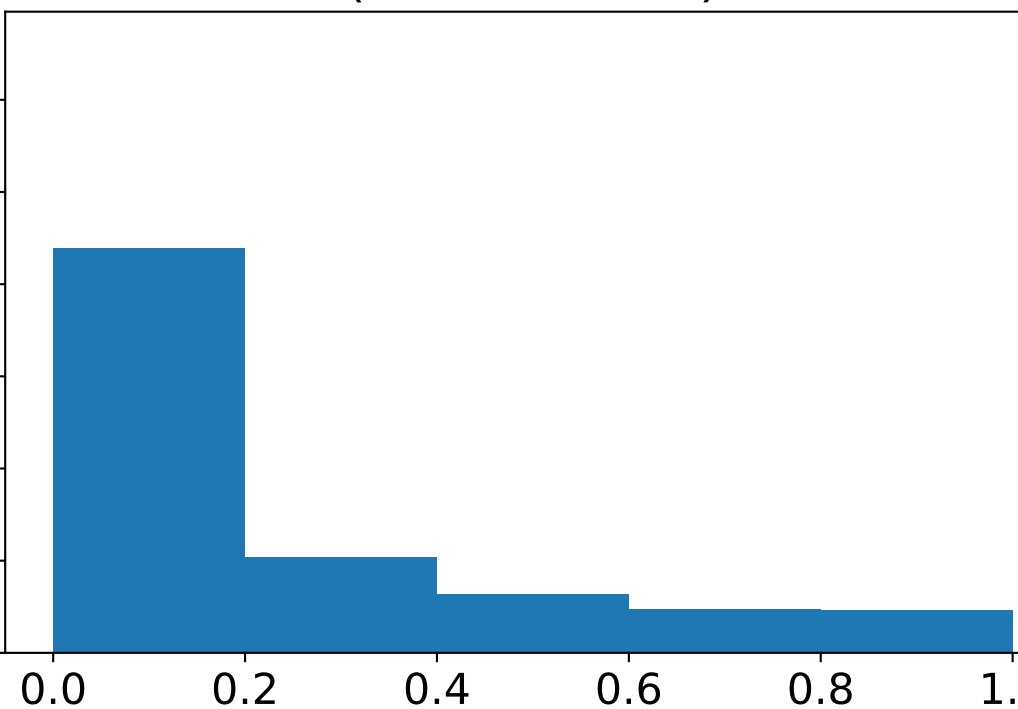

bandit\_self\_score\_mixed  
meta-llama/Meta-Llama-3-8B-Instruct  
(1725 attacks)

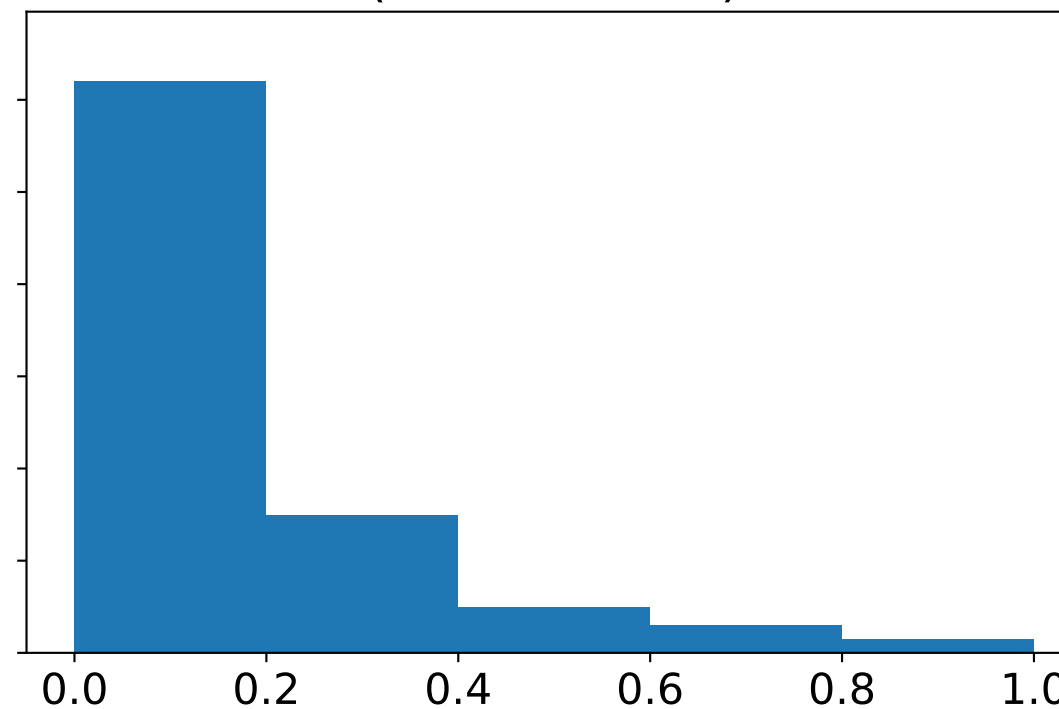

Supplement: supplementary_material [file attachment]
