# Supplementary material
Source: ML conference proceedings conference paper supplement (https://openreview.net/forum?id=zZ8fgXHkXi)

bandit\_offspring\_score\_mixed  
gpt-4o-2024-05-13  
(1936 attacks)

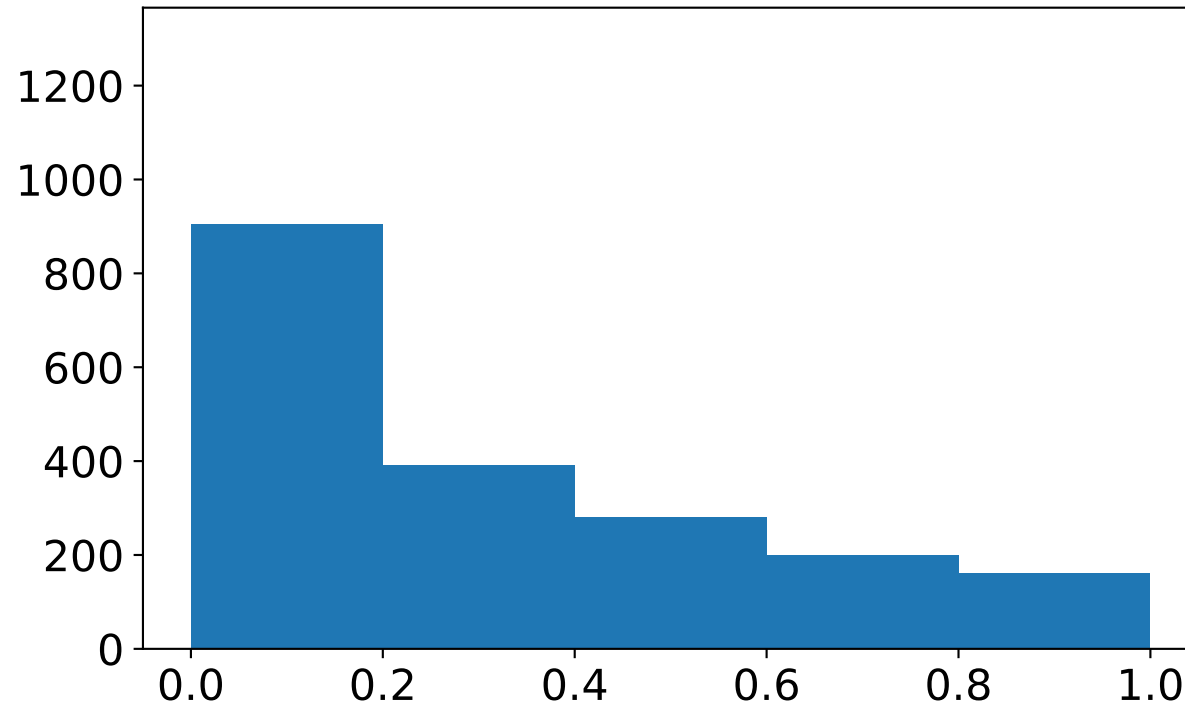

bandit\_random\_mixed  
gpt-4o-2024-05-13  
(1815 attacks)

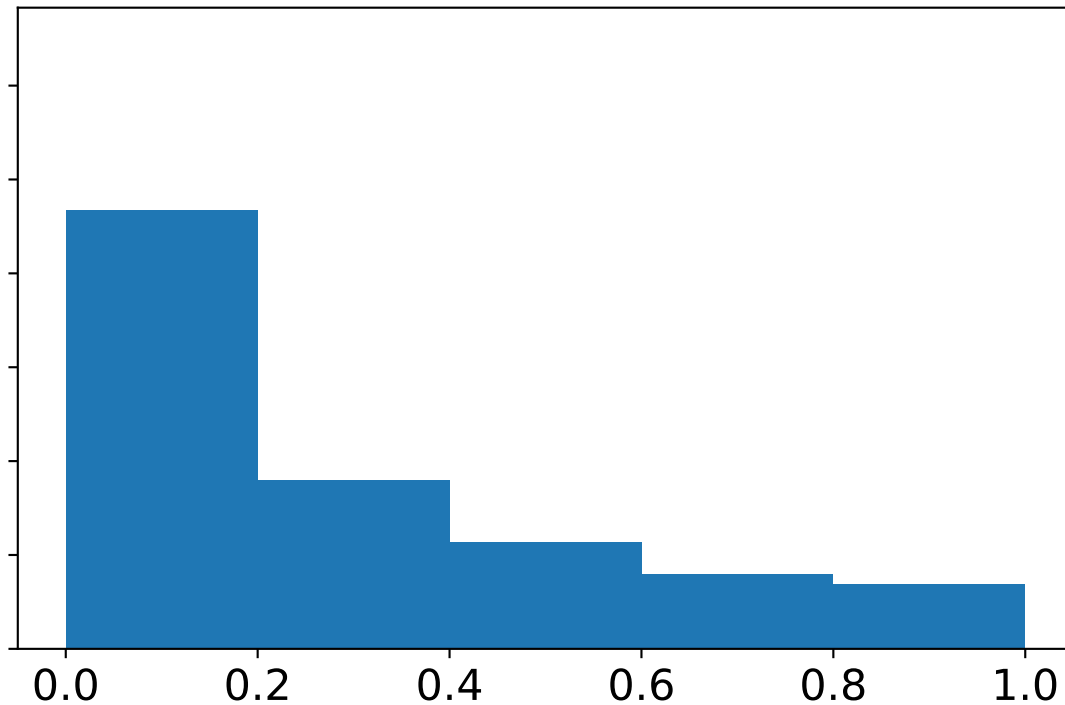

bandit\_self\_score\_lle  
gpt-4o-2024-05-13  
(1680 attacks)

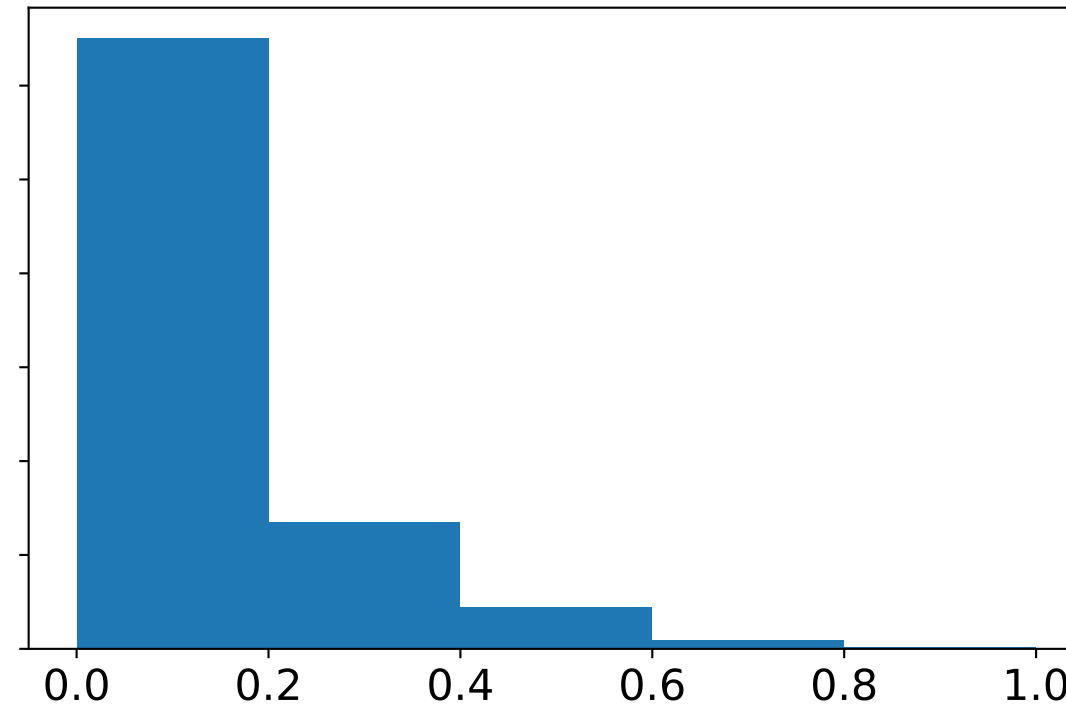

bandit\_self\_score\_mixed  
gpt-4o-2024-05-13  
(1939 attacks)

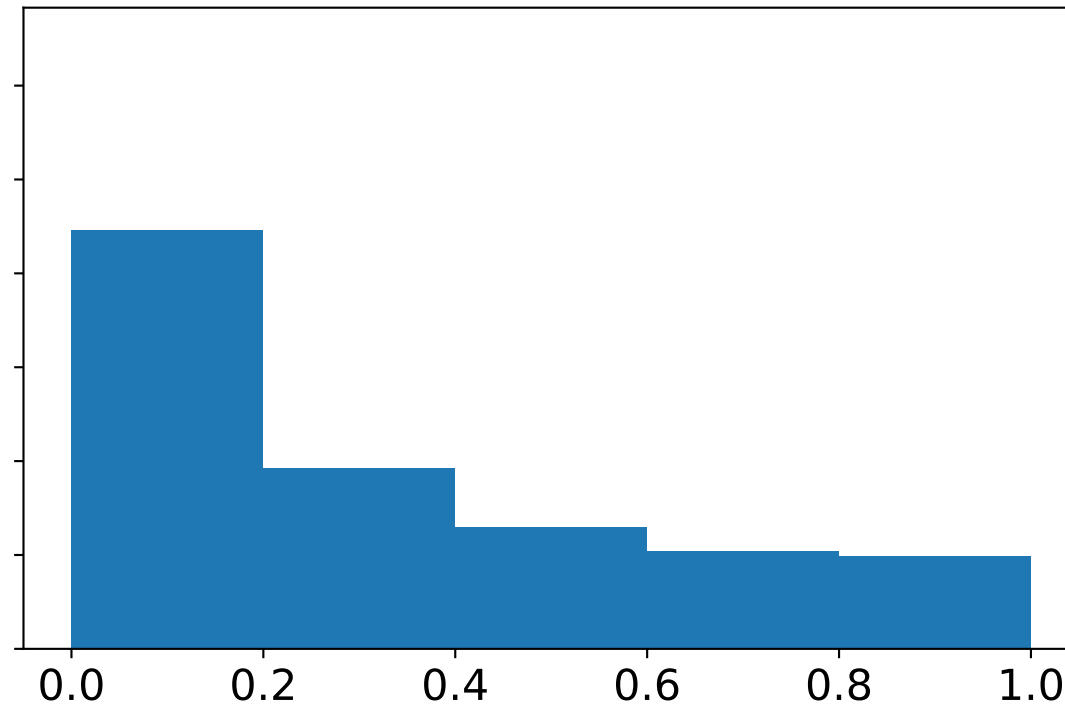

Supplement: supplementary_material [file attachment]
