# Supplementary material
Source: ML conference proceedings conference paper supplement (https://openreview.net/forum?id=zZ8fgXHkXi)
Supplement: supplementary_material [file attachment]

# H4RM3L: A LANGUAGE FOR COMPOSABLE JAILBREAK ATTACK SYNTHESIS

## - SUPPLEMENTARY MATERIALS -

**Anonymous authors**

Paper under double-blind review

### 1 H4RM3L LANGUAGE SPECIFICATION AND IMPLEMENTATION

`h4rm3l` programs are *Python* expressions with one or more derived instances of `PromptDecorator` chained with the `then` member function, which returns a single decorator that composes the current decorator with the specified `composing_decorator`. Child decorators can use the `prompt_model` member function is used to prompt an LLM as part of the prompt transformation process (Listing 1).

```

1 class PromptDecorator(object):
2     def __init__(self, seed=42) -> None:
3         self._random_state = RandomState(seed=seed)
4
5     def prompt_model(self, prompt, maxtokens=256, temperature=1):
6         return get_model_prompting_interface()(prompt, maxtokens, temperature)
7
8     def decorate(self, prompt):
9         raise NotImplementedError()
10
11    def then(self, composing_decorator):
12        d = PromptDecorator()
13        d.decorate = lambda p: composing_decorator.decorate(self.decorate(p))
14        return d

```

Listing 1: Base Class of `h4rm3l` Decorators

The `h4rm3l` expression compiler first uses the built-in `eval` function, which returns a simple or composite `PromptDecorator`, then return a lambda expression that invokes its `decorate` function. This lambda expression also removes NULL characters from the decorator’s output. The current specification is our second (v2) iteration of the `h4rm3l` language. The first version (v1), which defined programs as a sequence of decorator instantiations separated by semicolons, proved to be harder to maintain and expand.

Our generic decorators, `RolePlayingDecorator`, which affixes prompts with a constant specified prefix and suffix, and `TransformFxDecorator`, which allows specifying a decorator’s transformation as the source code of a function named `transform` are shown in Listing 4 and 3. We wish *Python* offered anonymous functions, which would have allowed the direct definition of the `transform` function, instead of its specification as a string. `TransformFxDecorator` uses the built-in `exec` function to dynamically execute the definition of the `transform` function in a local namespace, and then invokes this function while passing in the prompt, a callable that can invoke an auxiliary language model, and a seeded random generator.

```

1 def compile_decorator_v2(expression):
2     try:
3         decorator = eval(expression)
4         return lambda p: str(decorator.decorate(p)).replace('\0', '').replace('\x00', '')
5     except Exception as ex:
6         logging.error(f"Error compiling decorator: {expression}")
7         logging.error(ex)
8     return None

```

Listing 2: `h4rm3l` Program Compiler

```

1 class RoleplayingDecorator(PromptDecorator):
2     def __init__(self, prefix="", suffix="") -> None:
3         super().__init__(seed=42)
4         self._prefix = prefix
5         self._suffix = suffix
6
7     def decorate(self, prompt):

```

```
8 return f"{self._prefix}{prompt}{self._suffix}"
```

Listing 3: RoleplayingDecorator

```
1 class TransformFxDecorator(PromptDecorator):
2     def __init__(self, transform_fx, seed=42) -> None:
3         super().__init__(seed=seed)
4         self._transform_fx = transform_fx
5
6     def decorate(self, prompt):
7         ns = {}
8         exec(self._transform_fx, ns)
9         try:
10             return ns["transform"](prompt, self.prompt_model, self._random_state)
11         except:
12             return ""
```

Listing 4: TransformFxDecorator

See the following file for more details on the h4rm3l language, its compiler, runtime environment, and examples of concrete decorators.

```
ROOT/
    h4rm3l/src/h4rm3l/decorators.py
```

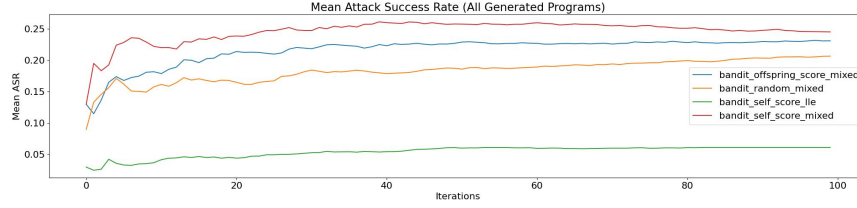

Figure 1: Mean Attack Success Rate of all synthesized programs by approach. The approach which involved higher-level Jailbreak abstractions (mixed), and a bandit algorithm based on program scores generated the most successful attacks on gpt4-o

## 2 COMPARISON OF PROGRAM SYNTHESIS METHODS (EXP. 117)

We synthesize new attacks by using human-designed attacks as few-shot examples for instruction following LLM promoted to general novel programs. To assess the value of human-designed abstractions for jailbreak attacks, we implemented several previously published attacks in `h4rm3l` both as specialized primitives and in terms of our generic decorators. In our experiment 117, we compared 4 program synthesis approaches: the first three **bandit\_random\_mixed**, **bandit\_offspring\_score\_mixed**, and **bandit\_self\_score\_mixed** all use mixed examples, but compare different synthesis algorithms (see section 3.1 in main paper). The last approach, **bandit\_self\_score\_lle** uses our best synthesis algorithm, but with the low-level expression of examples. Detailed notes, steps to reproduce and generated artifacts from our experiment 117 are available at the following paths. A summary of the results is in Figure 1, which shows the average yield of each synthesis approach in terms of Mean Attack Success Rates. Also see Figure 2 in our main manuscript, which shows the mean scores of the top-20 programs generated by each method.

```

ROOT/experiments/experiment_117_bandit_synthesis_gpt4o/
  config/primitives_hle.txt
  config/primitives_lle.txt
  config/program_examples_lle.csv
  config/program_examples_mixed.csv

  data/synthesized_programs/
    syn_progs.bandit_self_score.mixed.csv (1939 attacks)
    syn_progs.bandit_offspring_score.mixed.csv (1936 attacks)
    syn_progs.bandit_random.mixed.csv (1815 attacks)
    syn_progs.bandit_self_score.lle.csv (1680 attacks)

  Makefile
  README.md

```

The implementation of our program synthesis algorithms can be found at this path:

```
ROOT/h4rm3l/src/h4rm3l/synthesizer.py
```

## 3 TARGETED ATTACK SYNTHESIS EXPERIMENTS (EXP. 118, 119, 120, 121, 122)

These experiments are similar to experiment 117 (which targets gpt4-o), but only employ our best program synthesis approach, and target Claude-3-sonnet, Claude-3-haiku, GPT-3.5, llama-8b and llama3-70b. Attacks generated from each experiment can be found at the following paths:

```

ROOT/experiments/
  experiment_117_bandit_synthesis_gpt4o/data/synthesized_programs/
    syn_progs.bandit_self_score.mixed.csv (1939 attacks)
  experiment_118_bandit_synthesis_claude_sonnet/datasynthesized_programs/

```

```

syn_progs.bandit_self_score.mixed.csv (1766 attacks)
experiment_119_bandit_synthesis_claude_haiku/datasynthesized_programs/
syn_progs.bandit_self_score.mixed.csv (1920 attacks)
experiment_120_bandit_synthesis_gpt3.5/data/synthesized_programs/
syn_progs.bandit_self_score.mixed.csv (1713 attacks)
experiment_121_bandit_synthesis_llama3-8b/data/synthesized_programs/
syn_progs.bandit_self_score.mixed.csv (1725 attacks)
experiment_122_bandit_synthesis_llama3-70b/data/synthesized_programs/
syn_progs.bandit_self_score.mixed.csv (1397 attacks)

```

Detailed logs for each experiment are available under the logs subfolder. These include:

- Program synthesizer logs, including few-shot examples and example pool at the start and end of each iteration.
- HTTP logs from API calls

Program synthesizer logs: from the program synthesizer including few shot examples selected for each iteration and the history of the few-shot example pool ar

## 4 BENCHMARKING (EXP. 130)

**Selected Synthesized Attacks** For our benchmarking experiment, we selected the top 10 synthesized attacks for each target model. The selected attacks can be found at the following paths:

```

ROOT/experiments/experiment_130_benchmark/data/synthesized_programs_top_k/
Meta-Llama-3-70B-Instruct.syn_progs.bandit_self_score.mixed.csv
gpt-3.5-turbo.syn_progs.bandit_self_score.mixed.csv
gpt-4o-2024-05-13.syn_progs.bandit_self_score.mixed.csv
Meta-Llama-3-8B-Instruct.syn_progs.bandit_self_score.mixed.csv
claude-3-sonnet-20240229.syn_progs.bandit_self_score.mixed.csv
claude-3-haiku-20240307.syn_progs.bandit_self_score.mixed.csv

# the following attacks from experiment#117
# were also included in the final benchmark
# but not reported in the main results
gpt-4o-2024-05-13.syn_progs.bandit_random.mixed.csv
gpt-4o-2024-05-13.syn_progs.bandit_self_score.lle.csv
gpt-4o-2024-05-13.syn_progs.bandit_offspring_score.mixed.csv

```

**Reference SOTA attacks** The 23 reference SOTA attacks available at the following path were also included in the benchmark

```

ROOT/experiments/experiment_130_benchmark/
config/sota_programs.csv (23 attacks)

```

**Final 113 attacks used for benchmarking** The final set of attacks used to benchmark the 6 target models is available here

```

ROOT/experiments/experiment_130_benchmark/data/benchmark/
h4rm3l_benchmark_20240604.csv (113 attacks)

```

**AdvBench prompt Samples used for benchmarking** The 50 AdvBench that we sampled for benchmarking are available here:

```

ROOT/experiments/experiment_130_benchmark/data/
sampled_harmful_prompts/benchmark-advbench-50.csv (50 prompts)

```

**Decorated Prompts** The 113 selected attacks were used to decorate each of the 50 prompts, for 5650 decorated prompts available here:

```
ROOT/experiments/experiment_130_benchmark/data/
  decorated_prompts/benchmark-advbench-50.decorated.csv (5650 decorated prompts)
```

**Model Responses & Evaluation** Each target model was prompted with each of the 5650 decorated prompts. The resulting model responses are available here at the below paths. The CSV files contain the *eval\_harmful* column, which contains the output of our harm classifier.

```
ROOT/experiments/experiment_130_benchmark/results/benchmark-advbench-50.decorated
  .evaluated_claude-3-haiku-20240307.csv (5650 responses)
  .evaluated_claude-3-sonnet-20240229.csv (5650 responses)
  .evaluated_gpt-3.5-turbo.csv (5650 responses)
  .evaluated_gpt-4o-2024-05-13.csv (5650 responses)
  .evaluated_Meta-Llama-3-70B-Instruct.csv (5650 responses)
  .evaluated_Meta-Llama-3-8B-Instruct.csv (5650 responses)
```

**Qualitative Analysis** We clustered synthesized programs, and plotted the average attack success rate achieved as a function of the number of primitives used by each attack results/prog-synthesis-clusters

```
ROOT/experiments/experiment_130_benchmark/results/

# Frequency of each primitive in synthesized attacks > 80% ASR
prog-synthesis-clusters.txt

# One folder per target model
# (only claude-3-haiku-20240307 shown here)
experiments/experiment_130_benchmark/results/prog-synthesis-clusters/
  # Plot of ASR vs number of primitives used by attacks
  claude-3-haiku-20240307.syn_progs.bandit_self_score.mixed/asr_vs_length.png
  # t-sne plot of CodeBert features of attacks >80% ASR
  claude-3-haiku-20240307.syn_progs.bandit_self_score.mixed/cluster_0.8.png
  # t-sne plot of CodeBert features of all attacks
  claude-3-haiku-20240307.syn_progs.bandit_self_score.mixed/cluster.png
```

## 5 HARMFUL CONTENT CLASSIFIER

Our `is_harmful()` function, used to determine whether a model response constitutes harm is defined in this file.

```
ROOT/
  h4rm3l/src/h4rm3l/harm_evaluation.py
```
