# Supplementary material
Source: ML conference proceedings conference paper supplement (https://openreview.net/forum?id=zZ8fgXHkXi)

T-sne projection of CodeBERT embeddings of Jailbreak Attacks  $\geq 0.4$  ASR

Grouped Scatter Plot

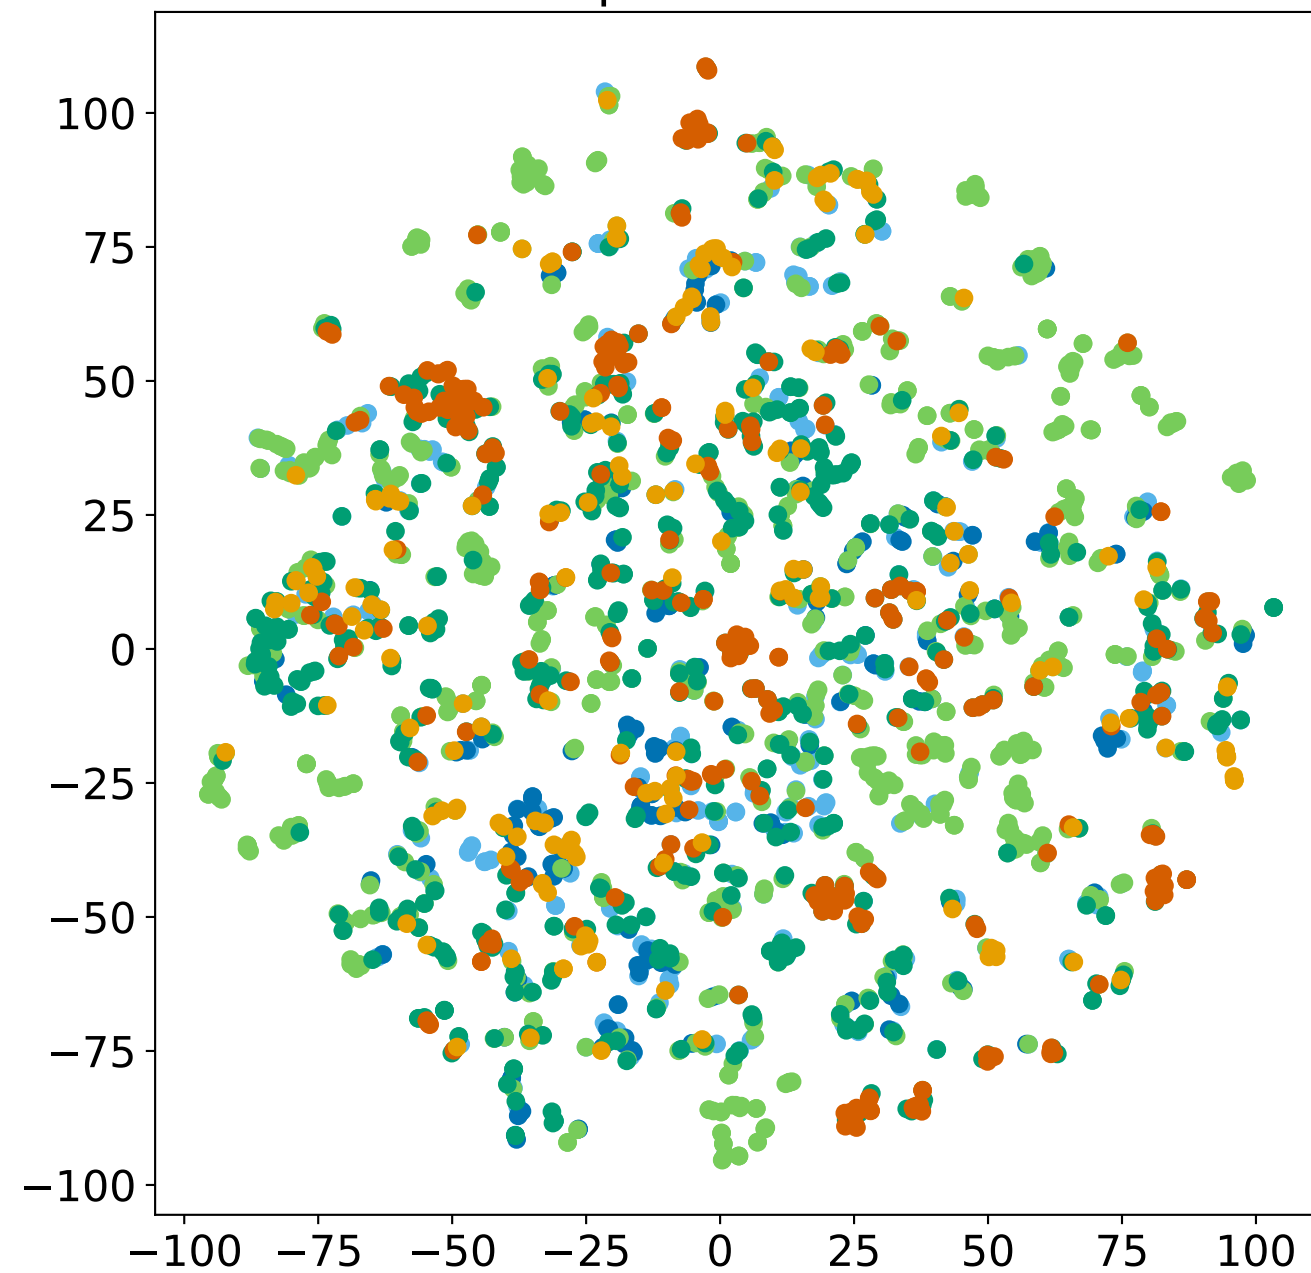

- bandit\_self\_score/mixed/claude-3-haiku-20240307(376)
- bandit\_self\_score/mixed/claude-3-sonnet-20240229(237)
- bandit\_self\_score/mixed/gpt-3.5-turbo(879)
- bandit\_self\_score/mixed/gpt-4o-2024-05-13(664)
- bandit\_self\_score/mixed/meta-llama/Meta-Llama-3-70B-Instruct(313)
- bandit\_self\_score/mixed/meta-llama/Meta-Llama-3-8B-Instruct(187)

ASR Scatter Plot

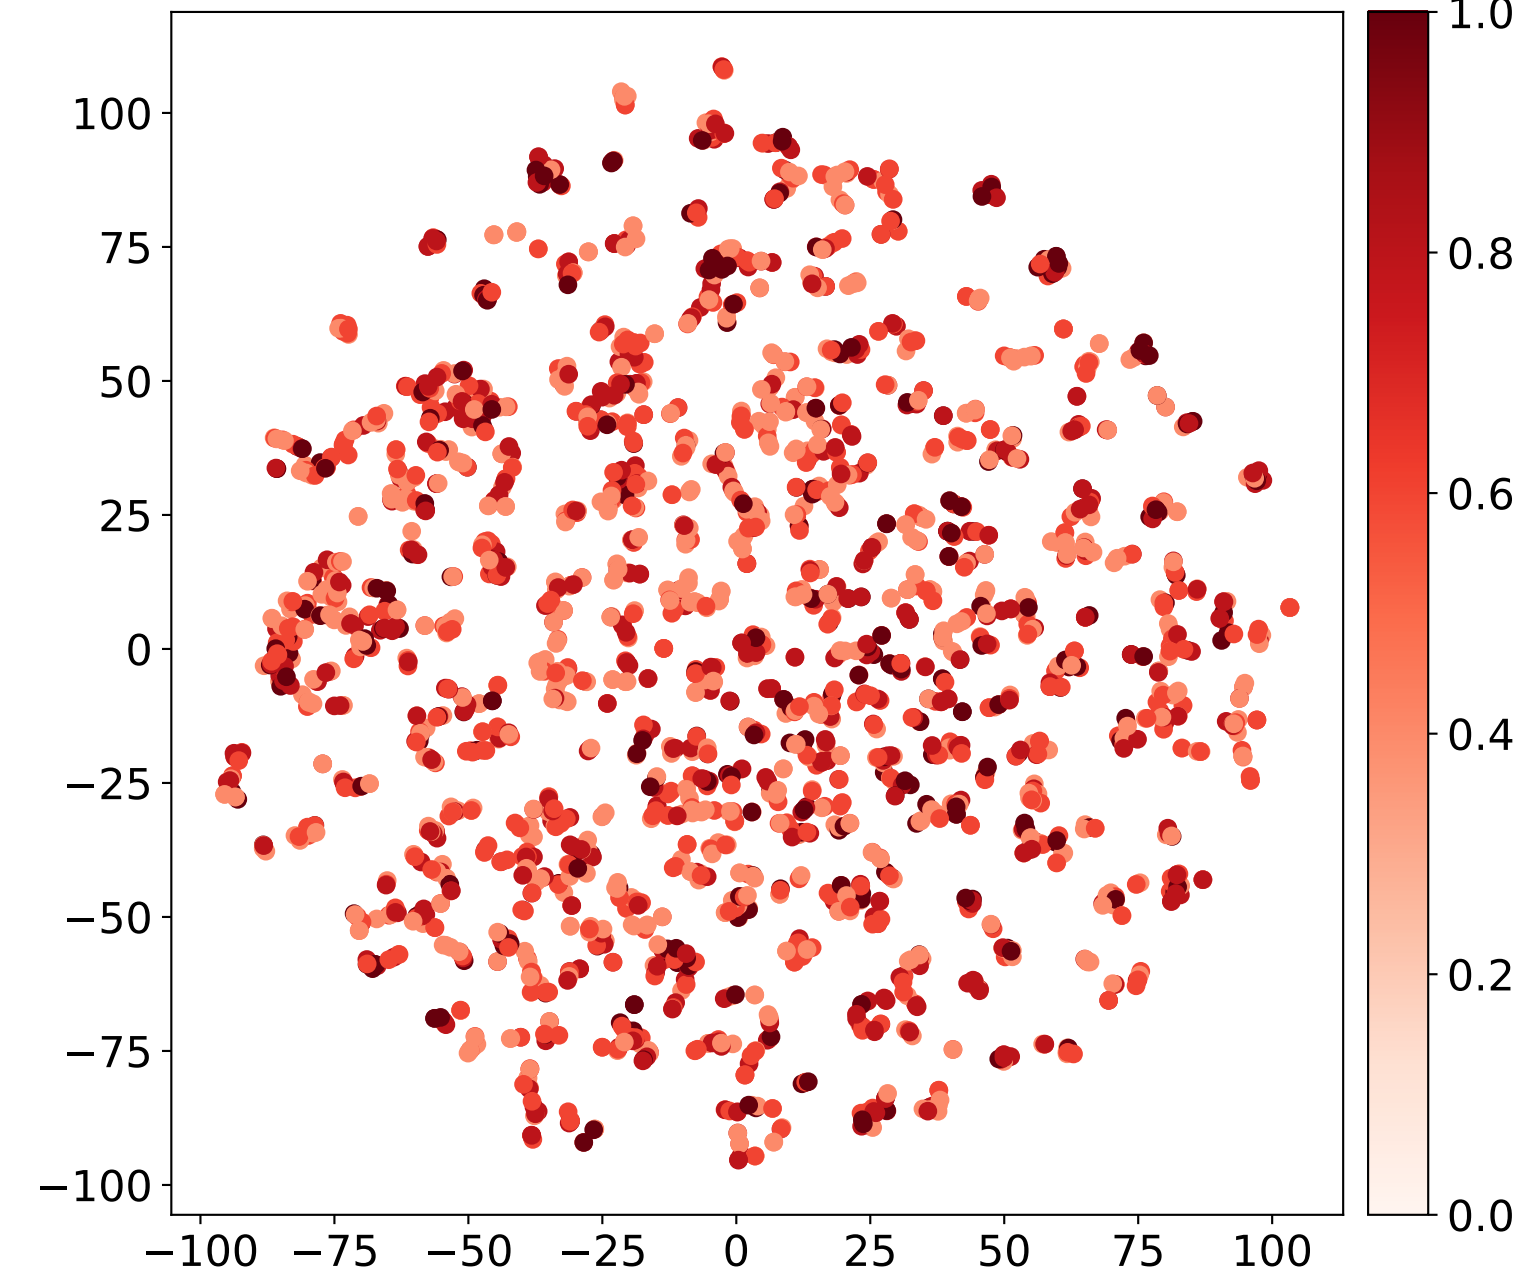

Supplement: supplementary_material [file attachment]
