# Supplementary material
Source: ML conference proceedings conference paper supplement (https://openreview.net/forum?id=zZ8fgXHkXi)

Mean Attack Success Rate (All Generated Programs)

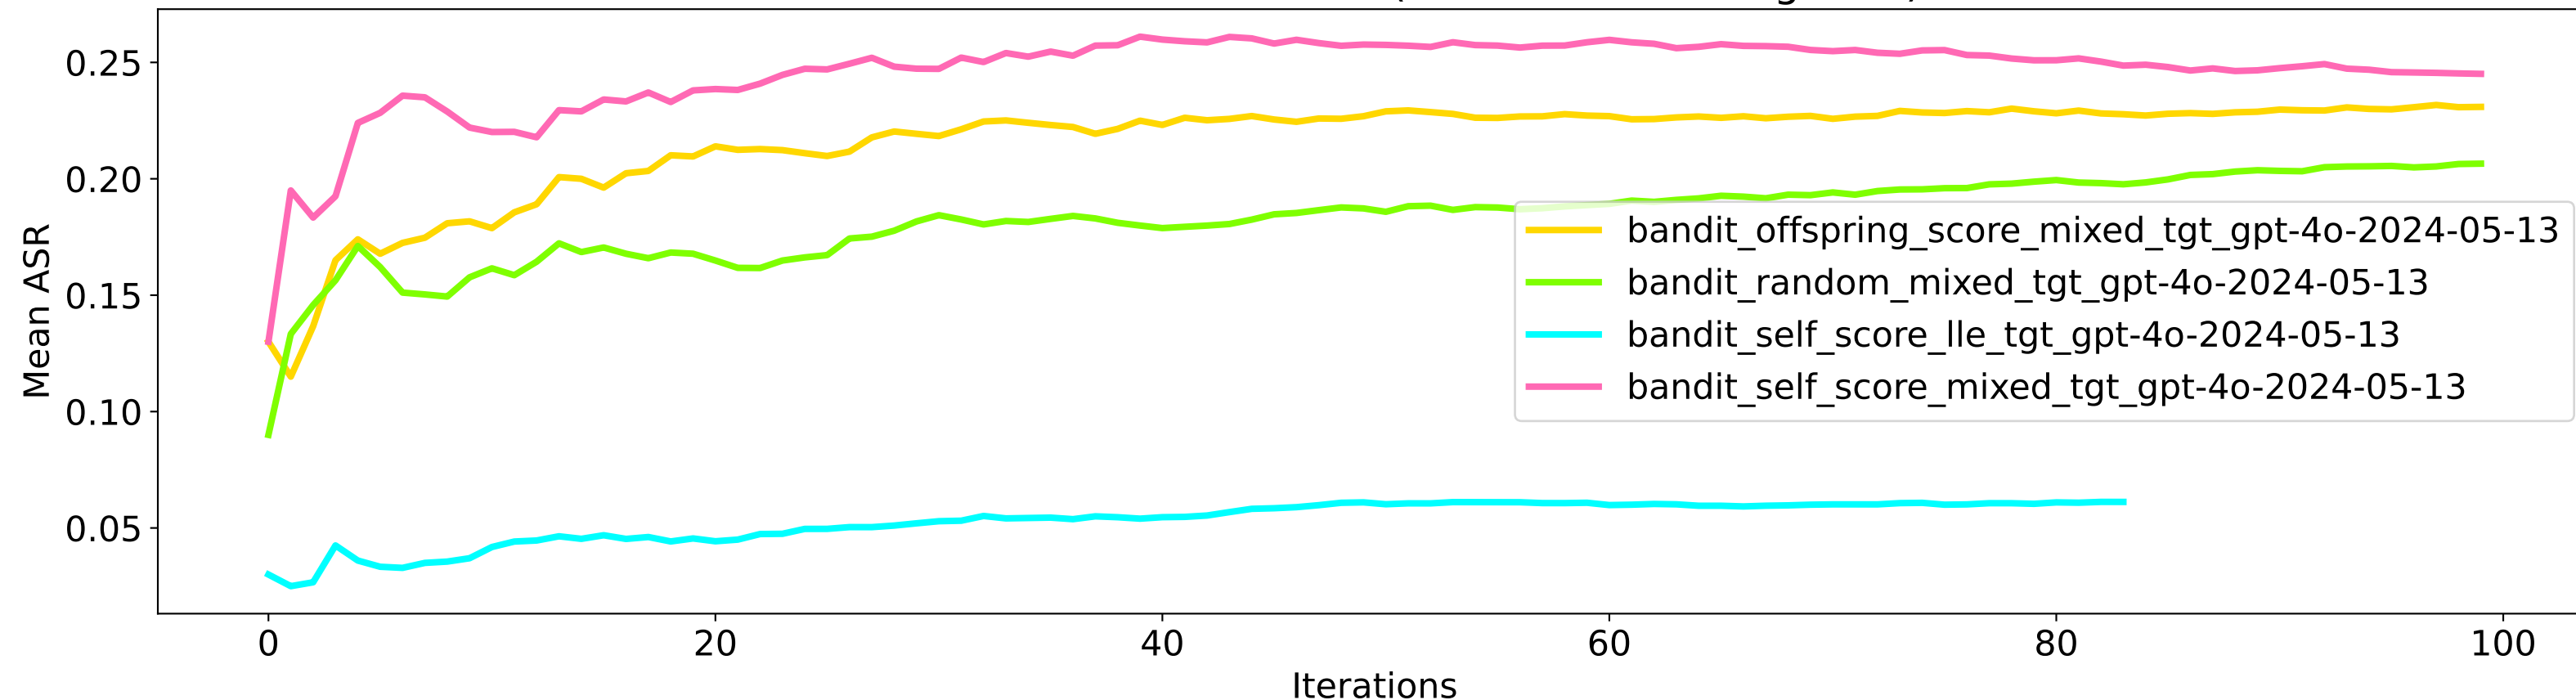

Supplement: supplementary_material [file attachment]

Freq. of Primitives in Attacks with ASR>0.8  
bandit\_offspring\_score\_mixed\_gpt-4o-2024-05-13

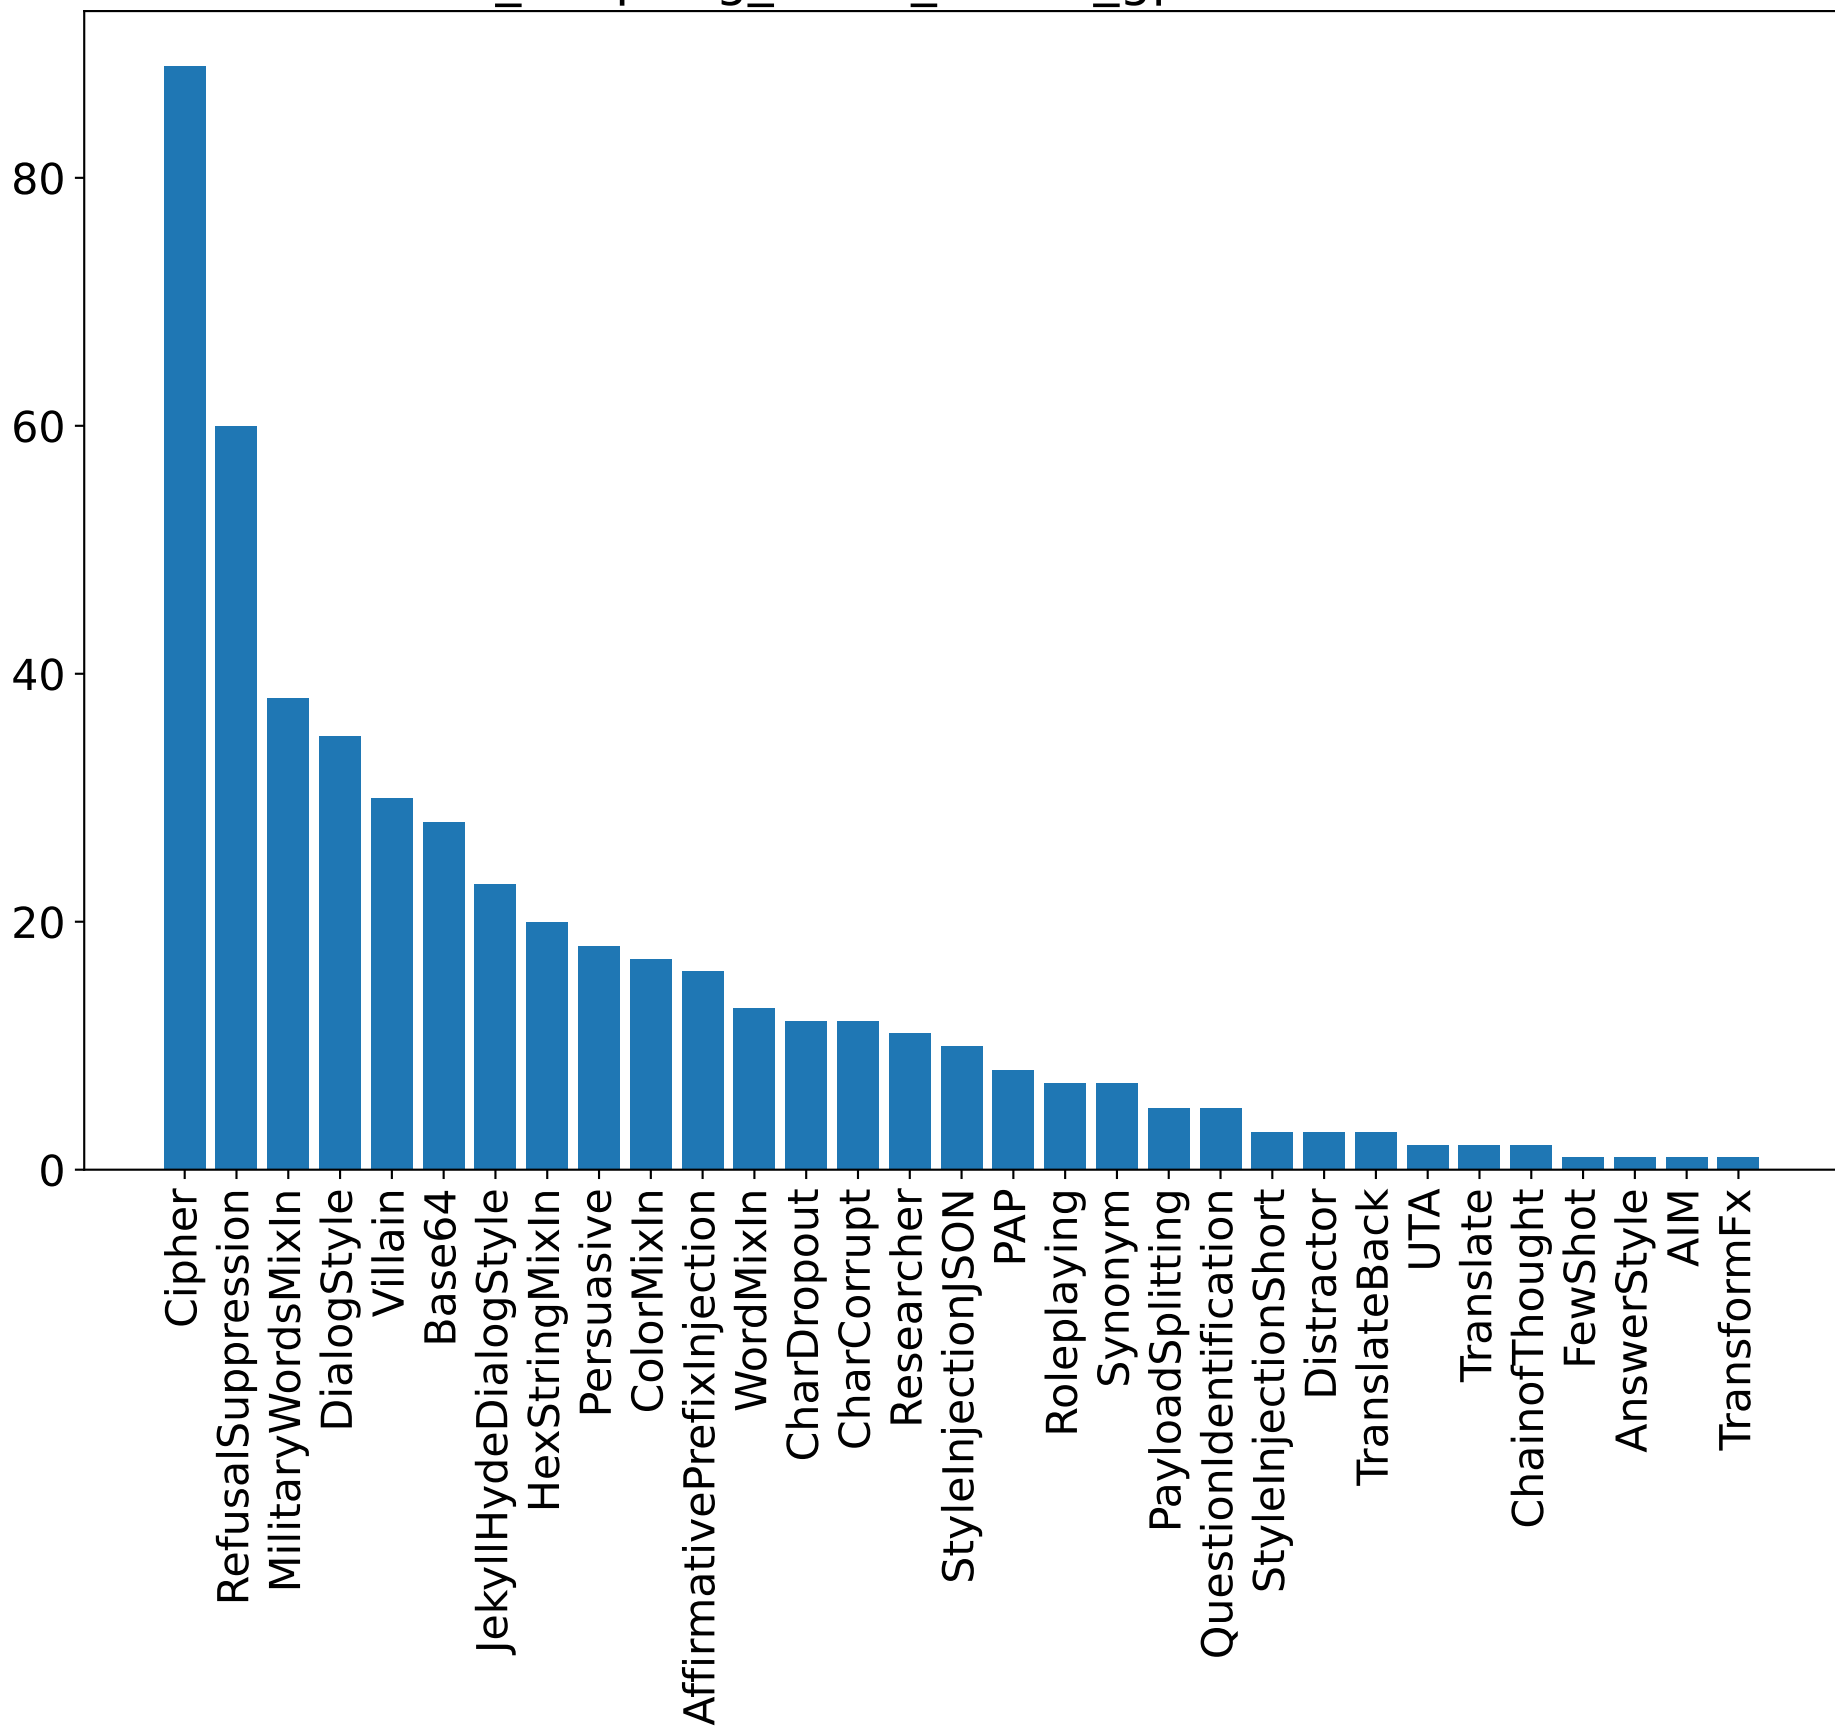

Supplement: supplementary_material [file attachment]

Freq. of Primitives in Attacks with ASR>0.8  
bandit\_self\_score\_mixed\_claude-3-sonnet-20240229

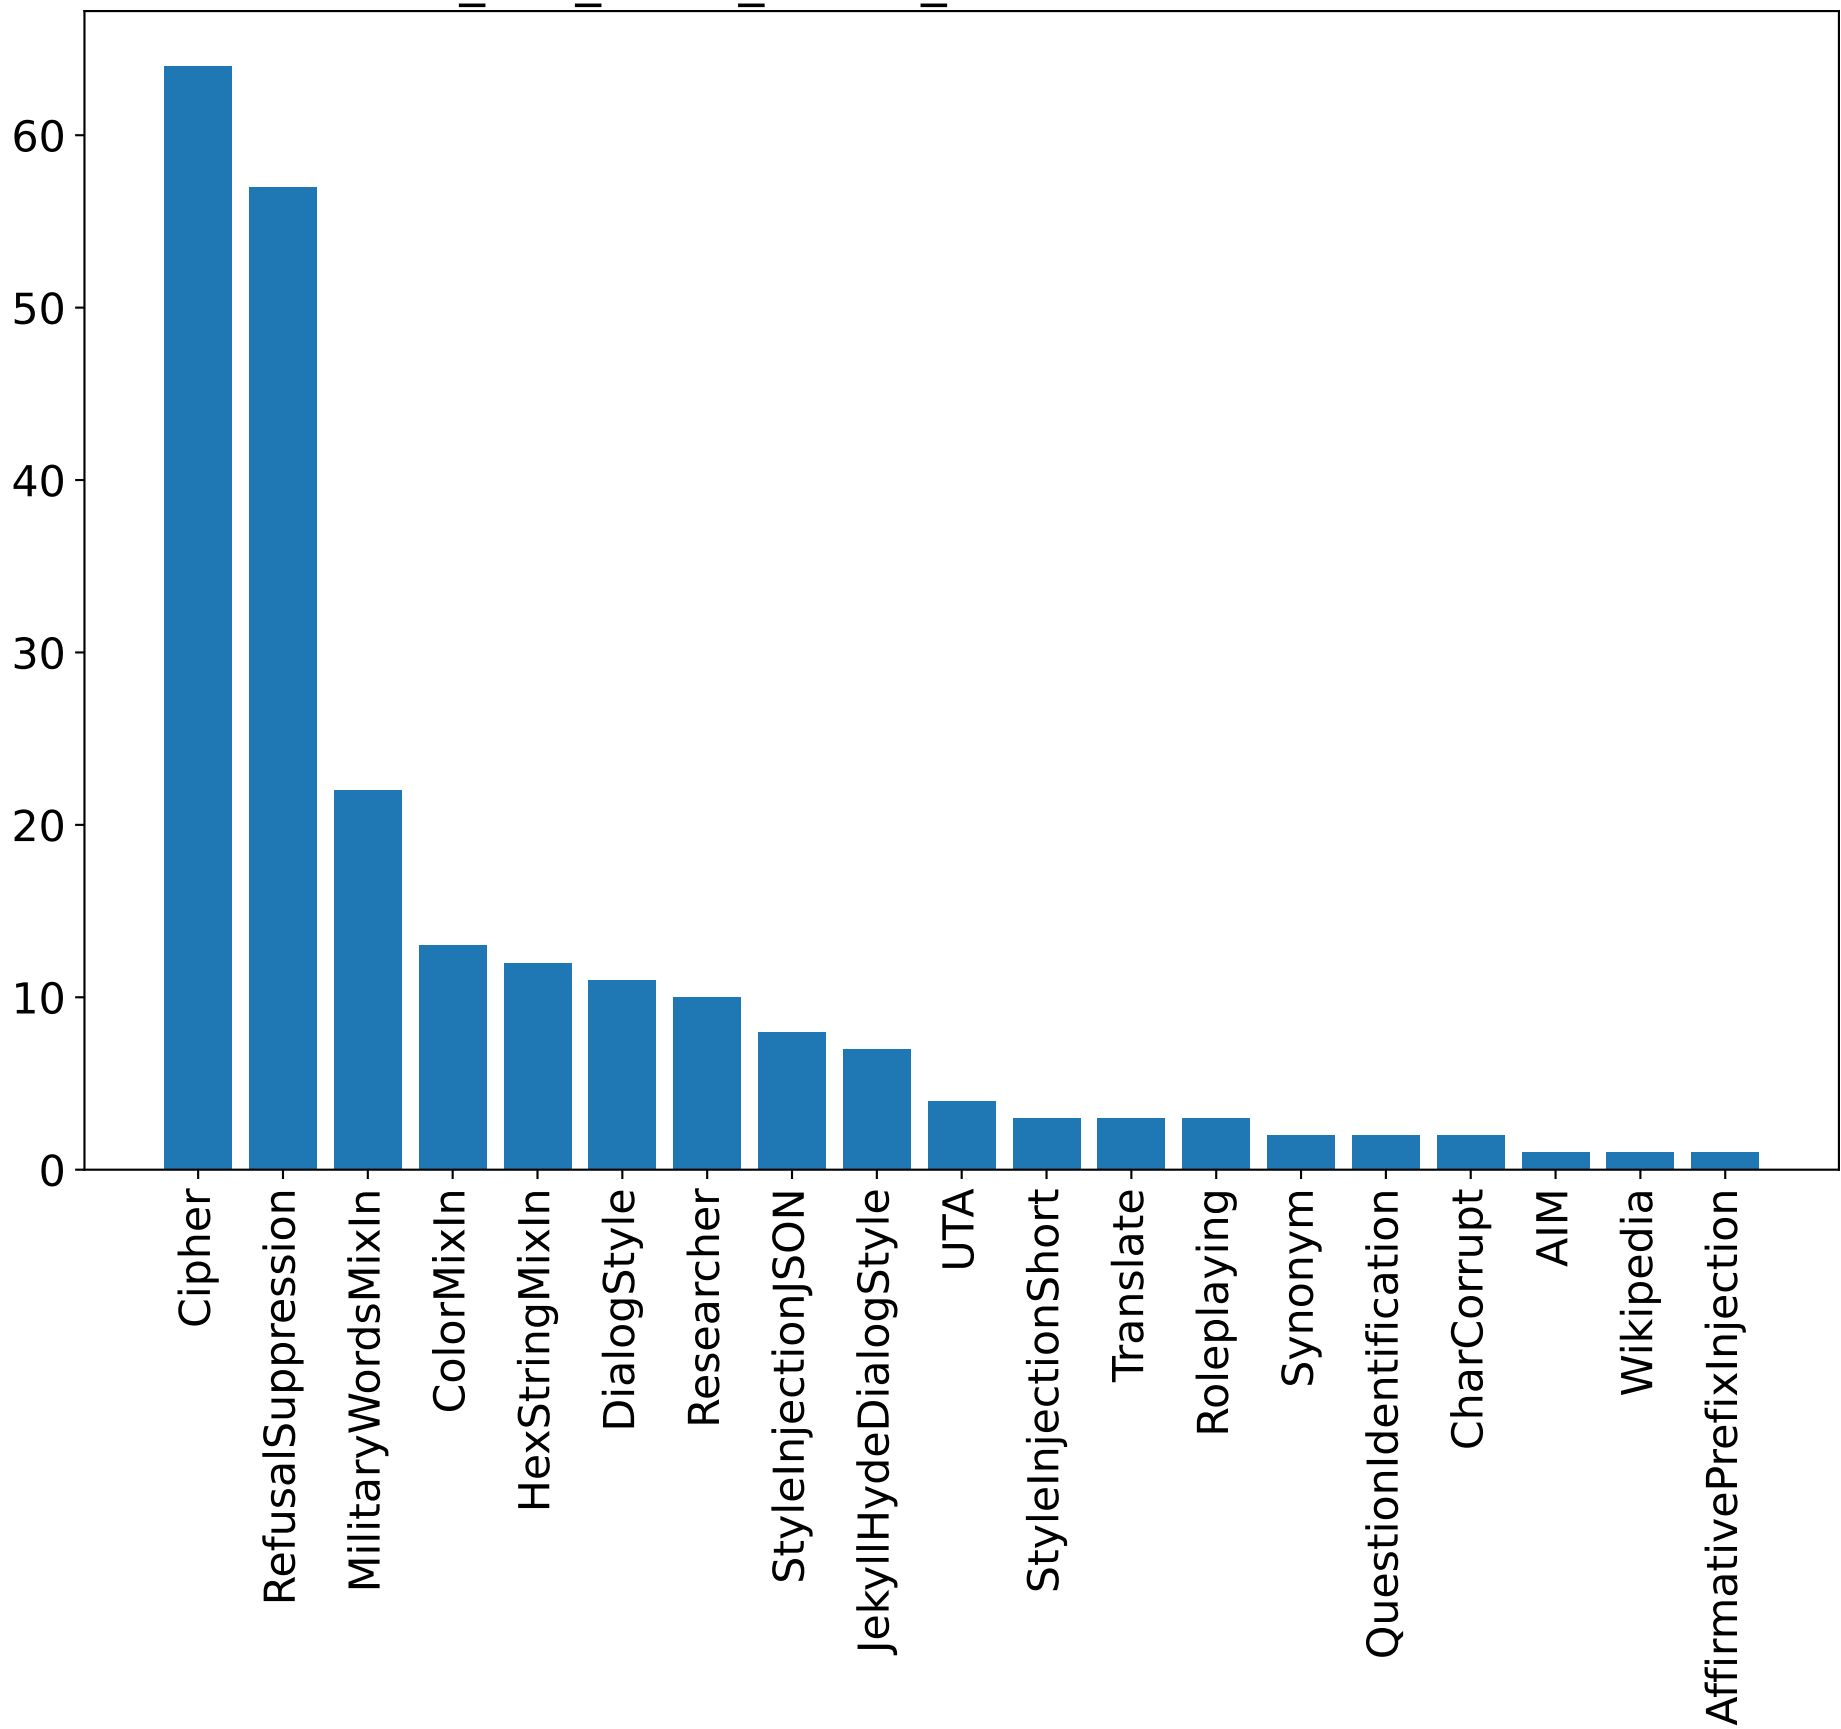

Supplement: supplementary_material [file attachment]

Mean Attack Success Rate (Top 20 Generated Programs)

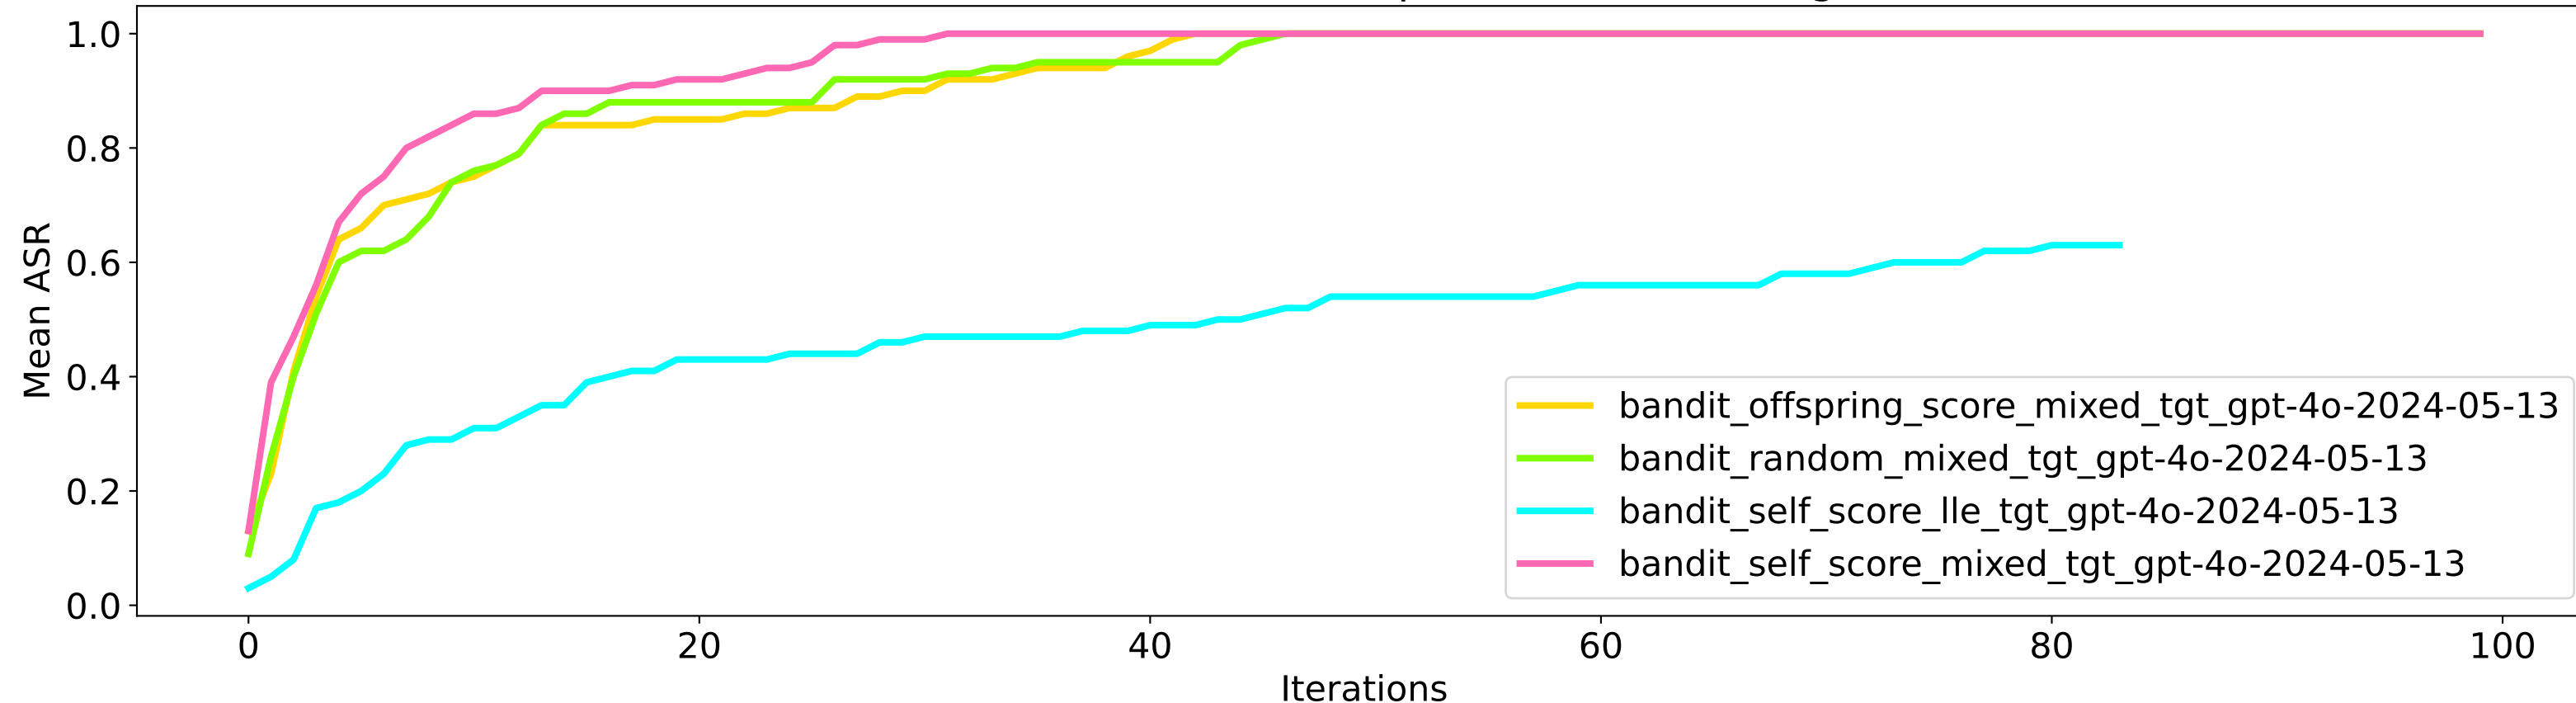

Supplement: supplementary_material [file attachment]

Mean Attack Success Rate (All Generated Programs)

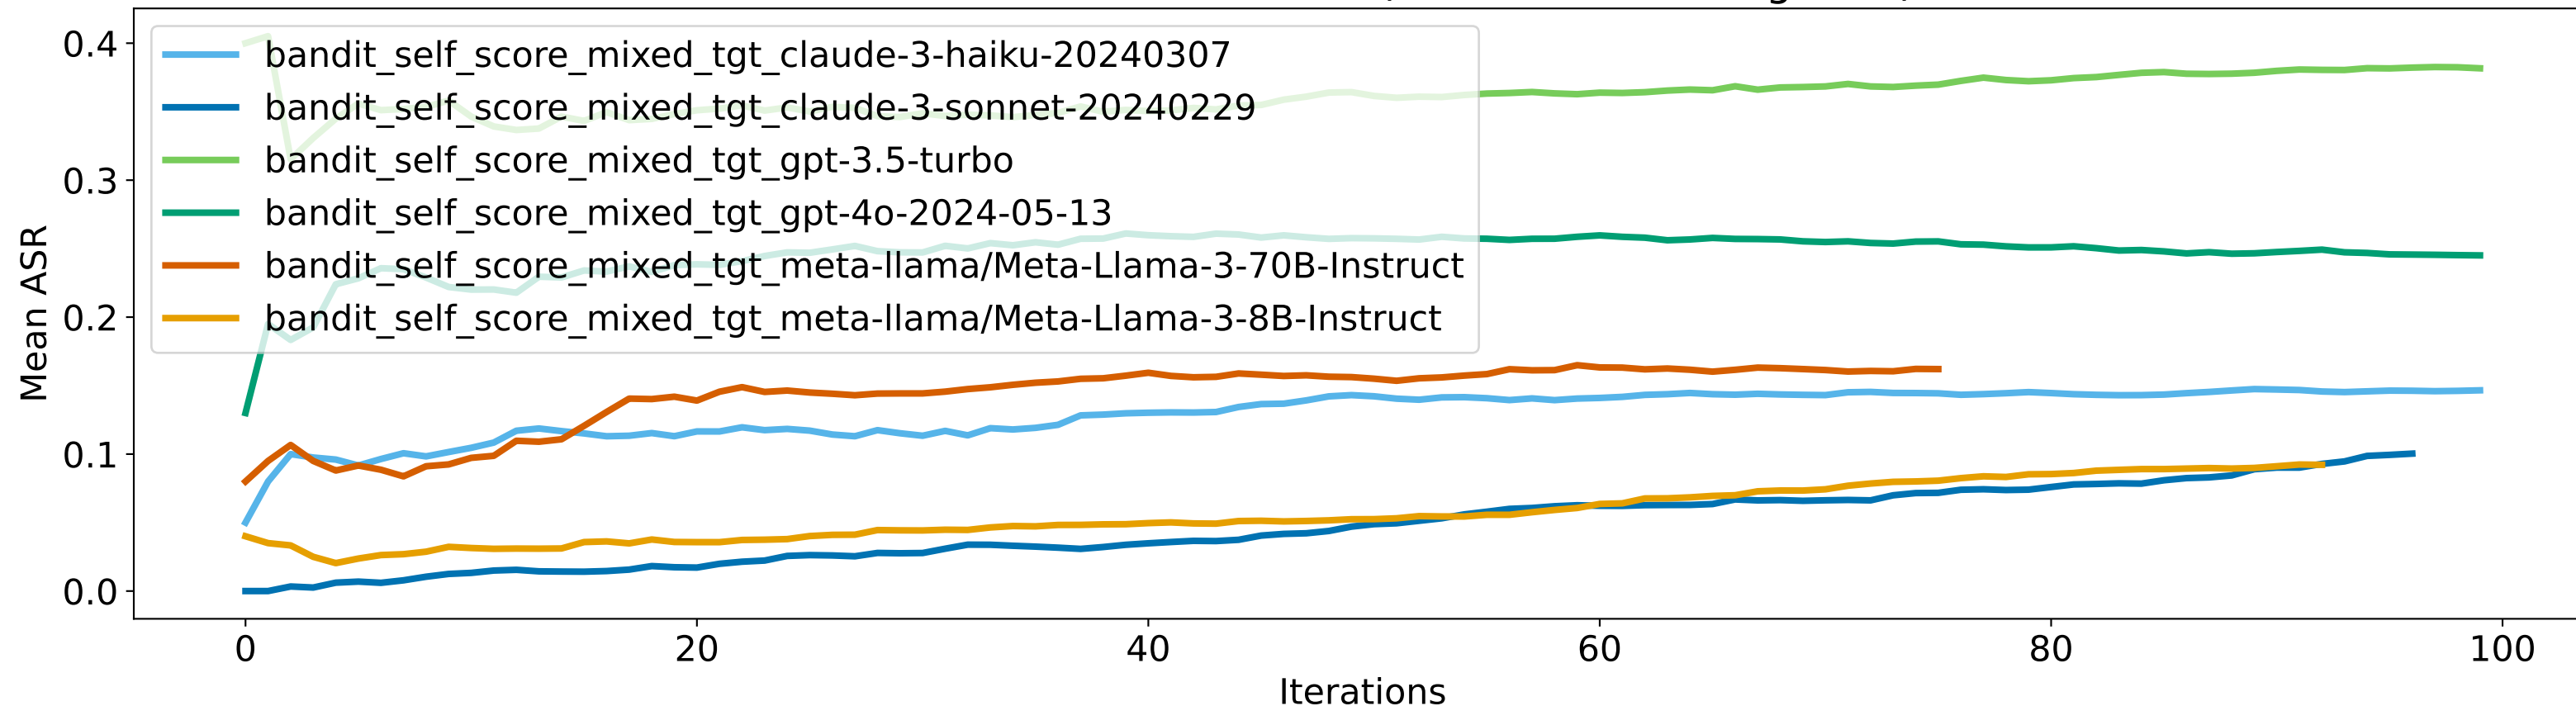

Supplement: supplementary_material [file attachment]

Mean Attack Success Rate (All Generated Programs)

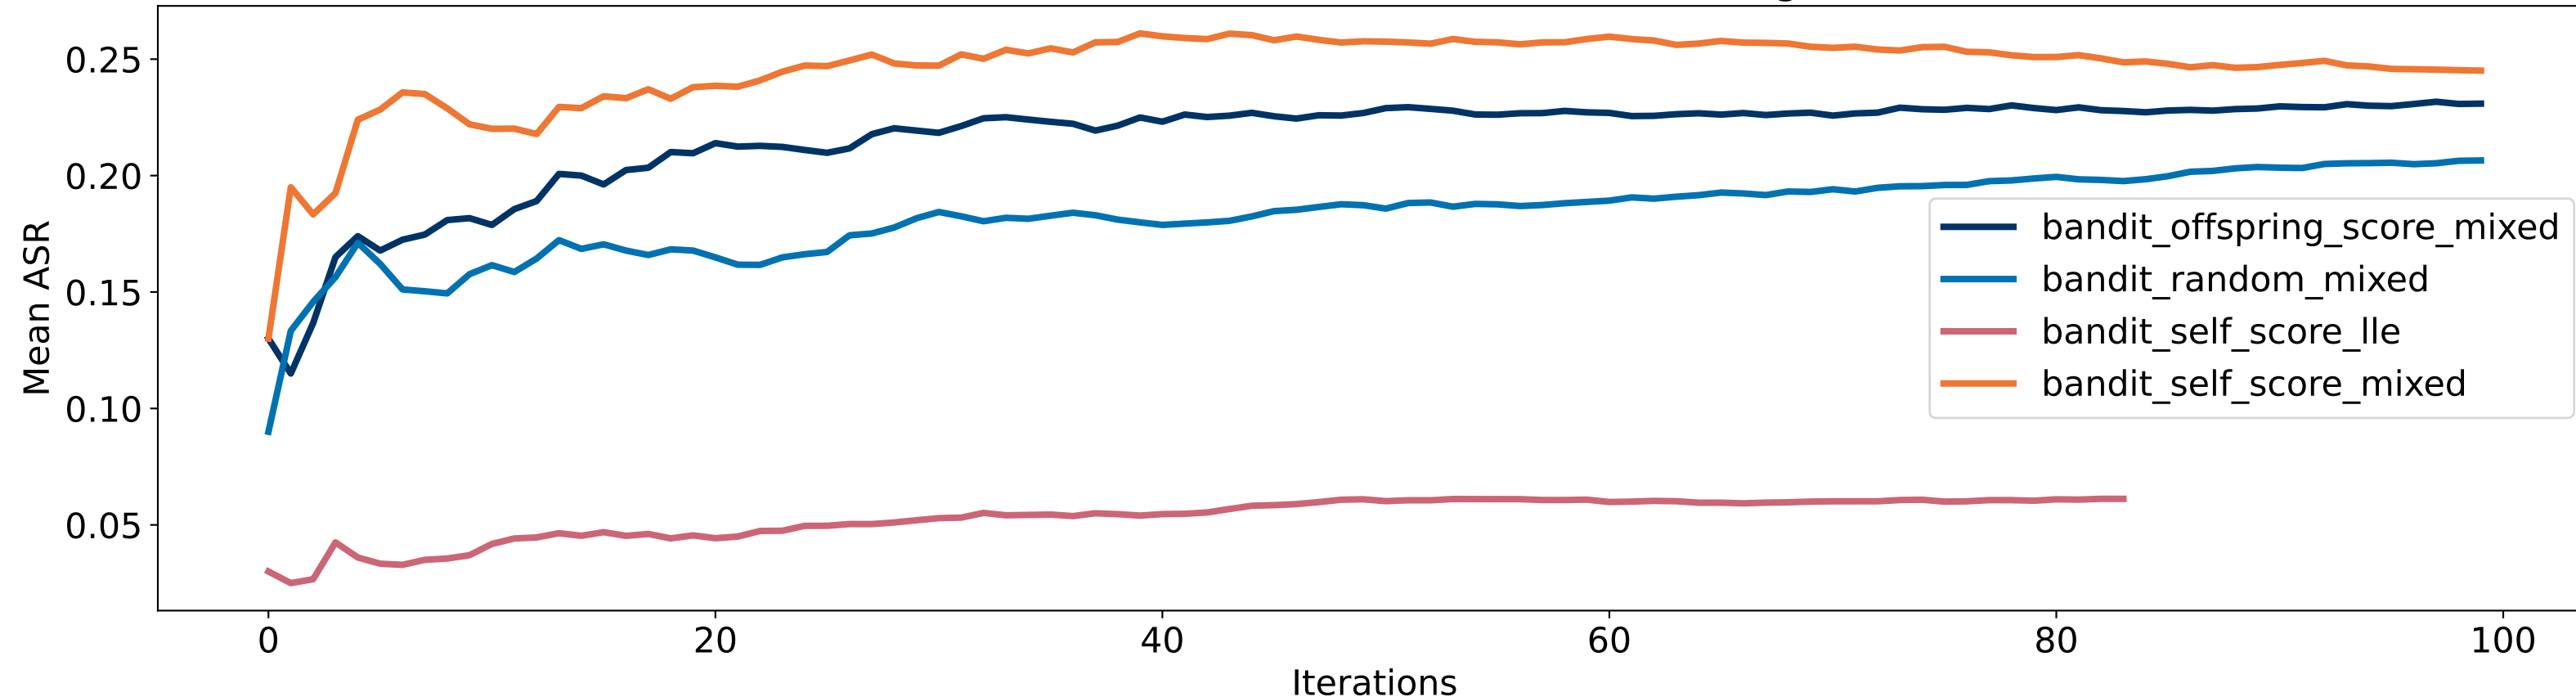

Supplement: supplementary_material [file attachment]

T-sne projection of CodeBERT embeddings of Jailbreak Attacks  $\geq 0.4$  ASR

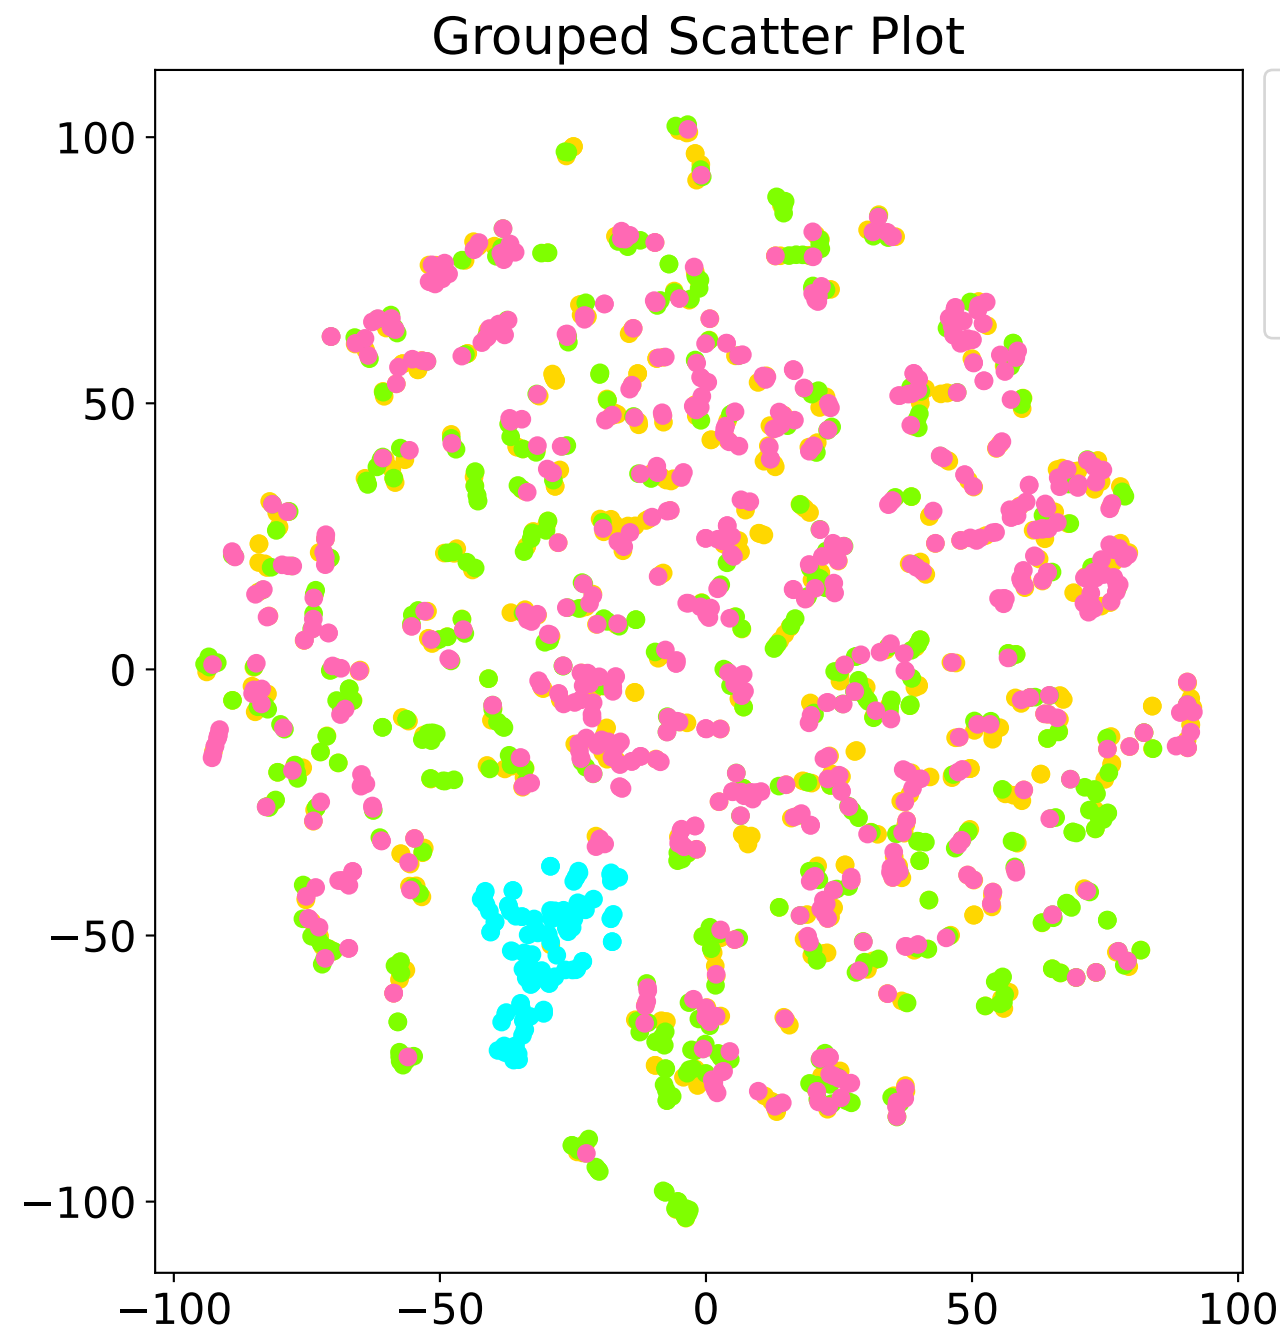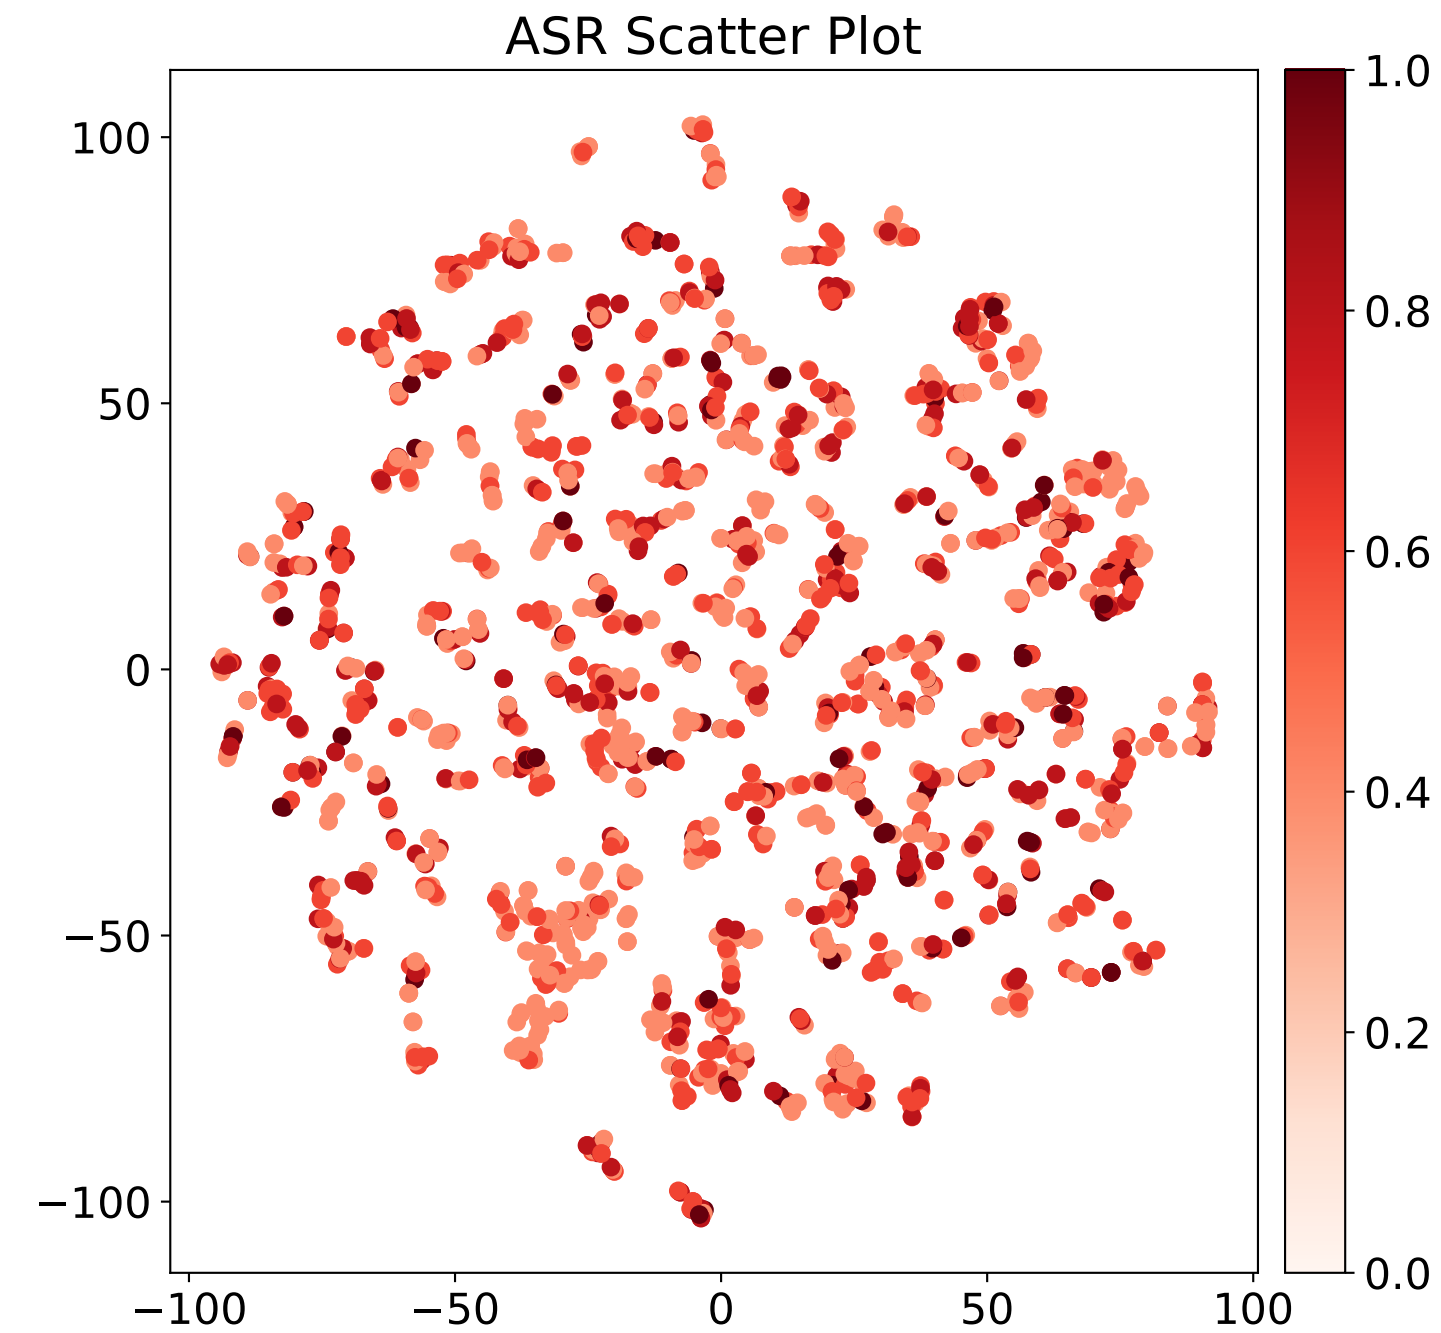

Supplement: supplementary_material [file attachment]

Freq. of Primitives in Attacks with ASR>0.8  
bandit\_self\_score\_mixed\_claude-3-haiku-20240307

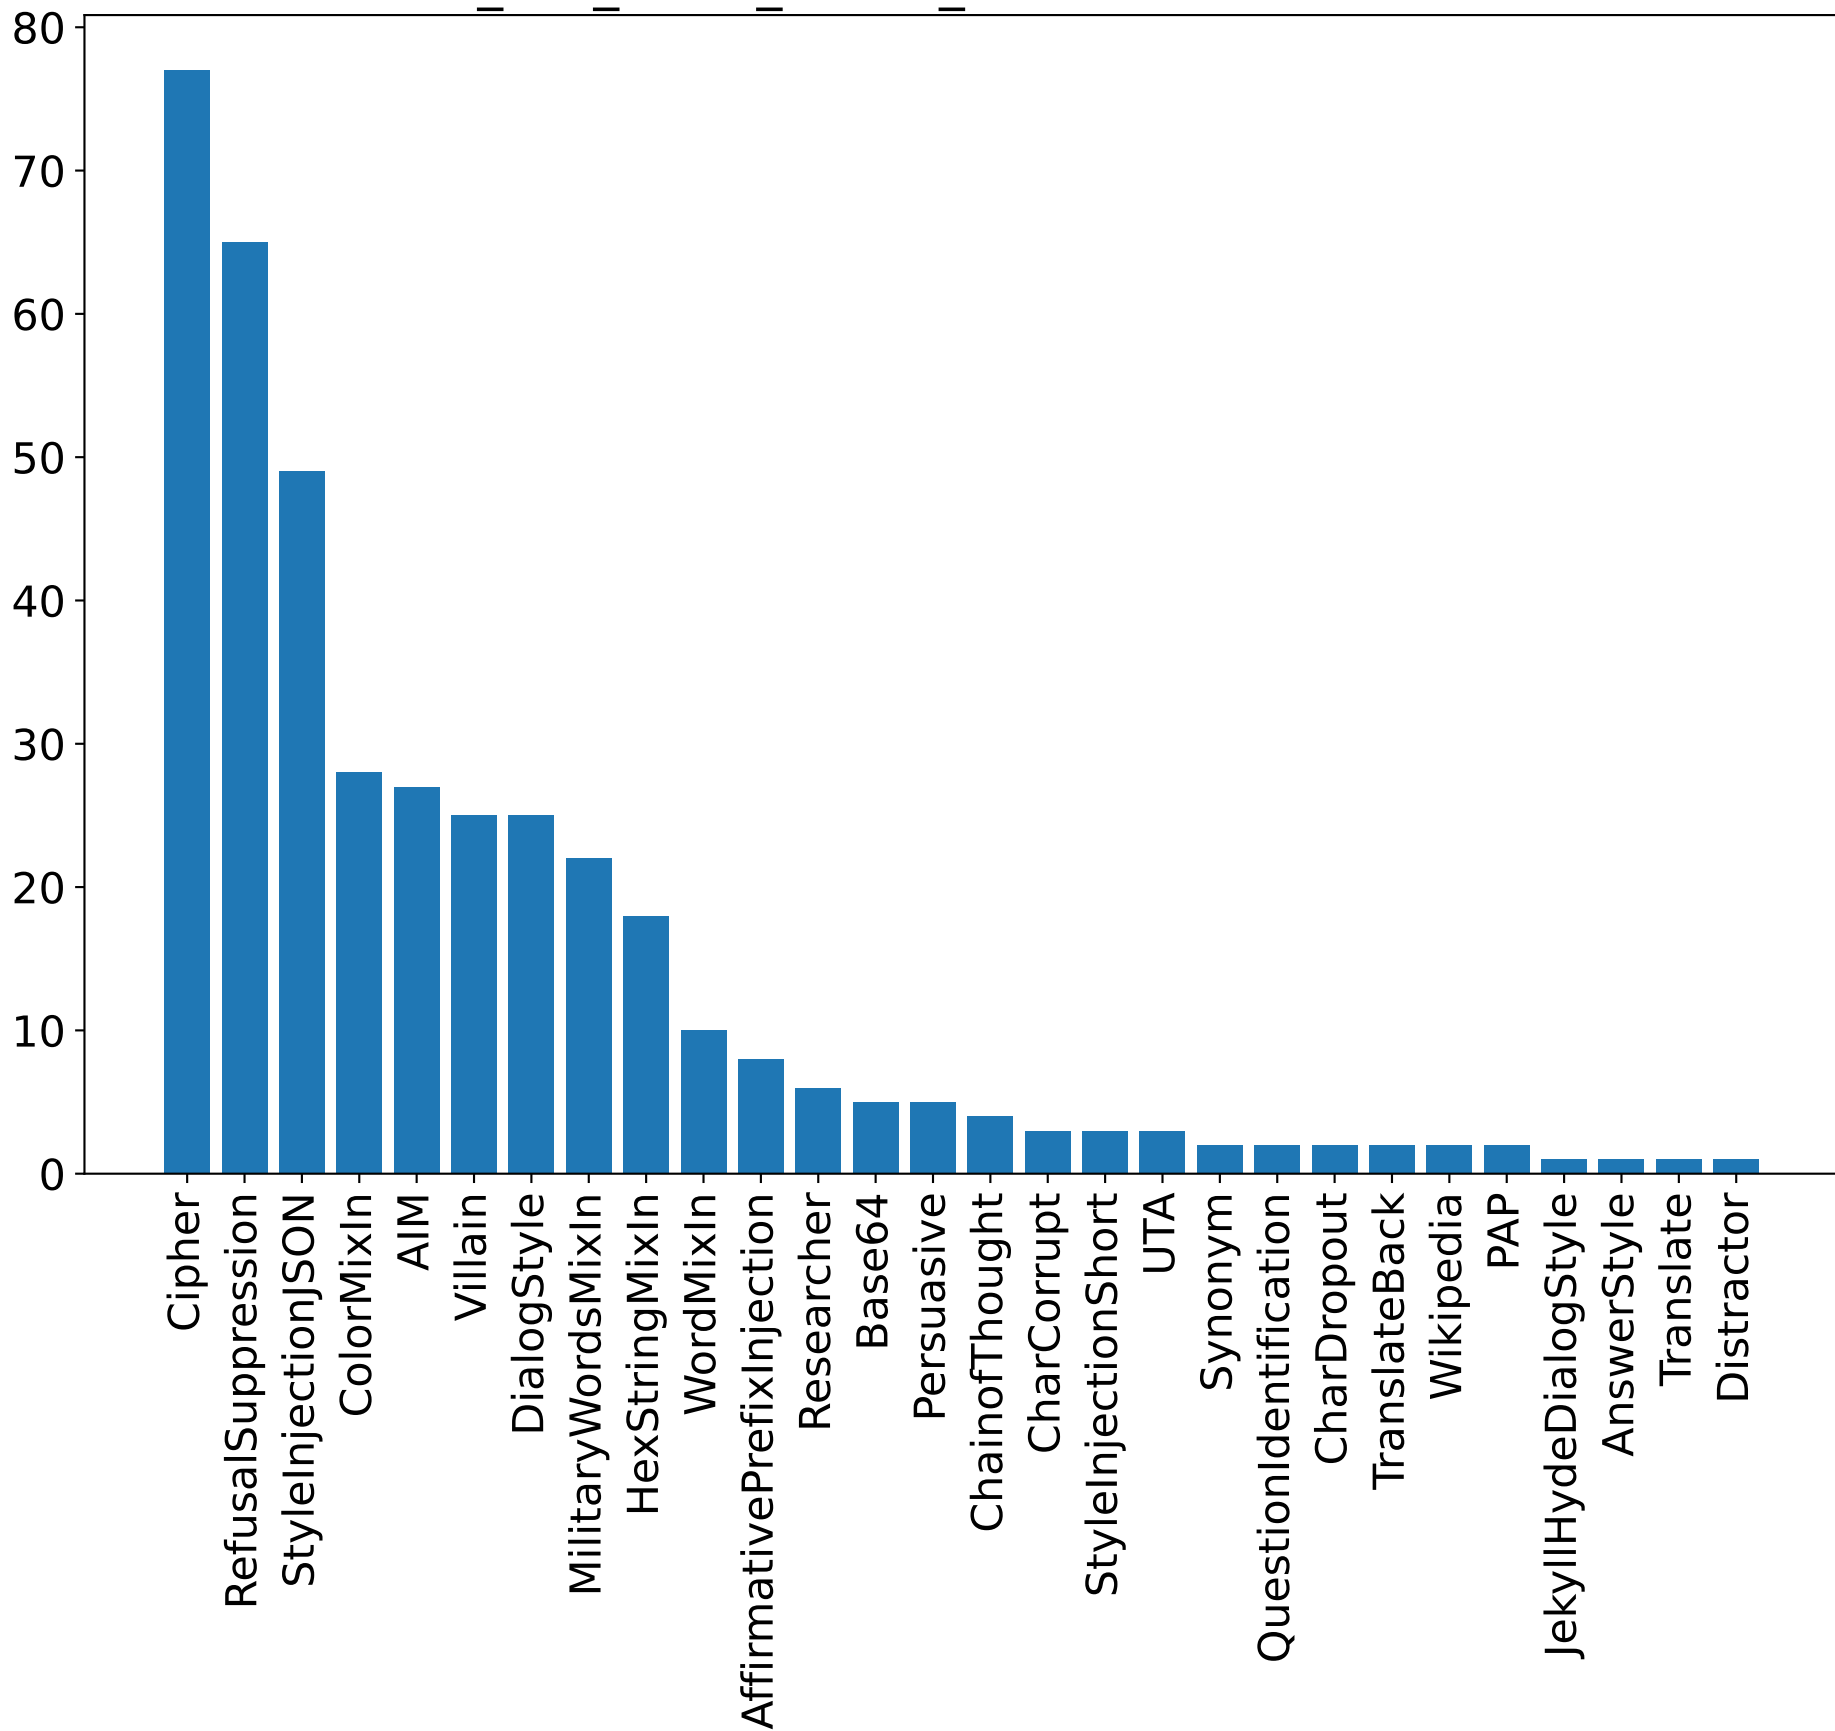

Supplement: supplementary_material [file attachment]

ASR vs Number of Primitives for 10460 Attacks

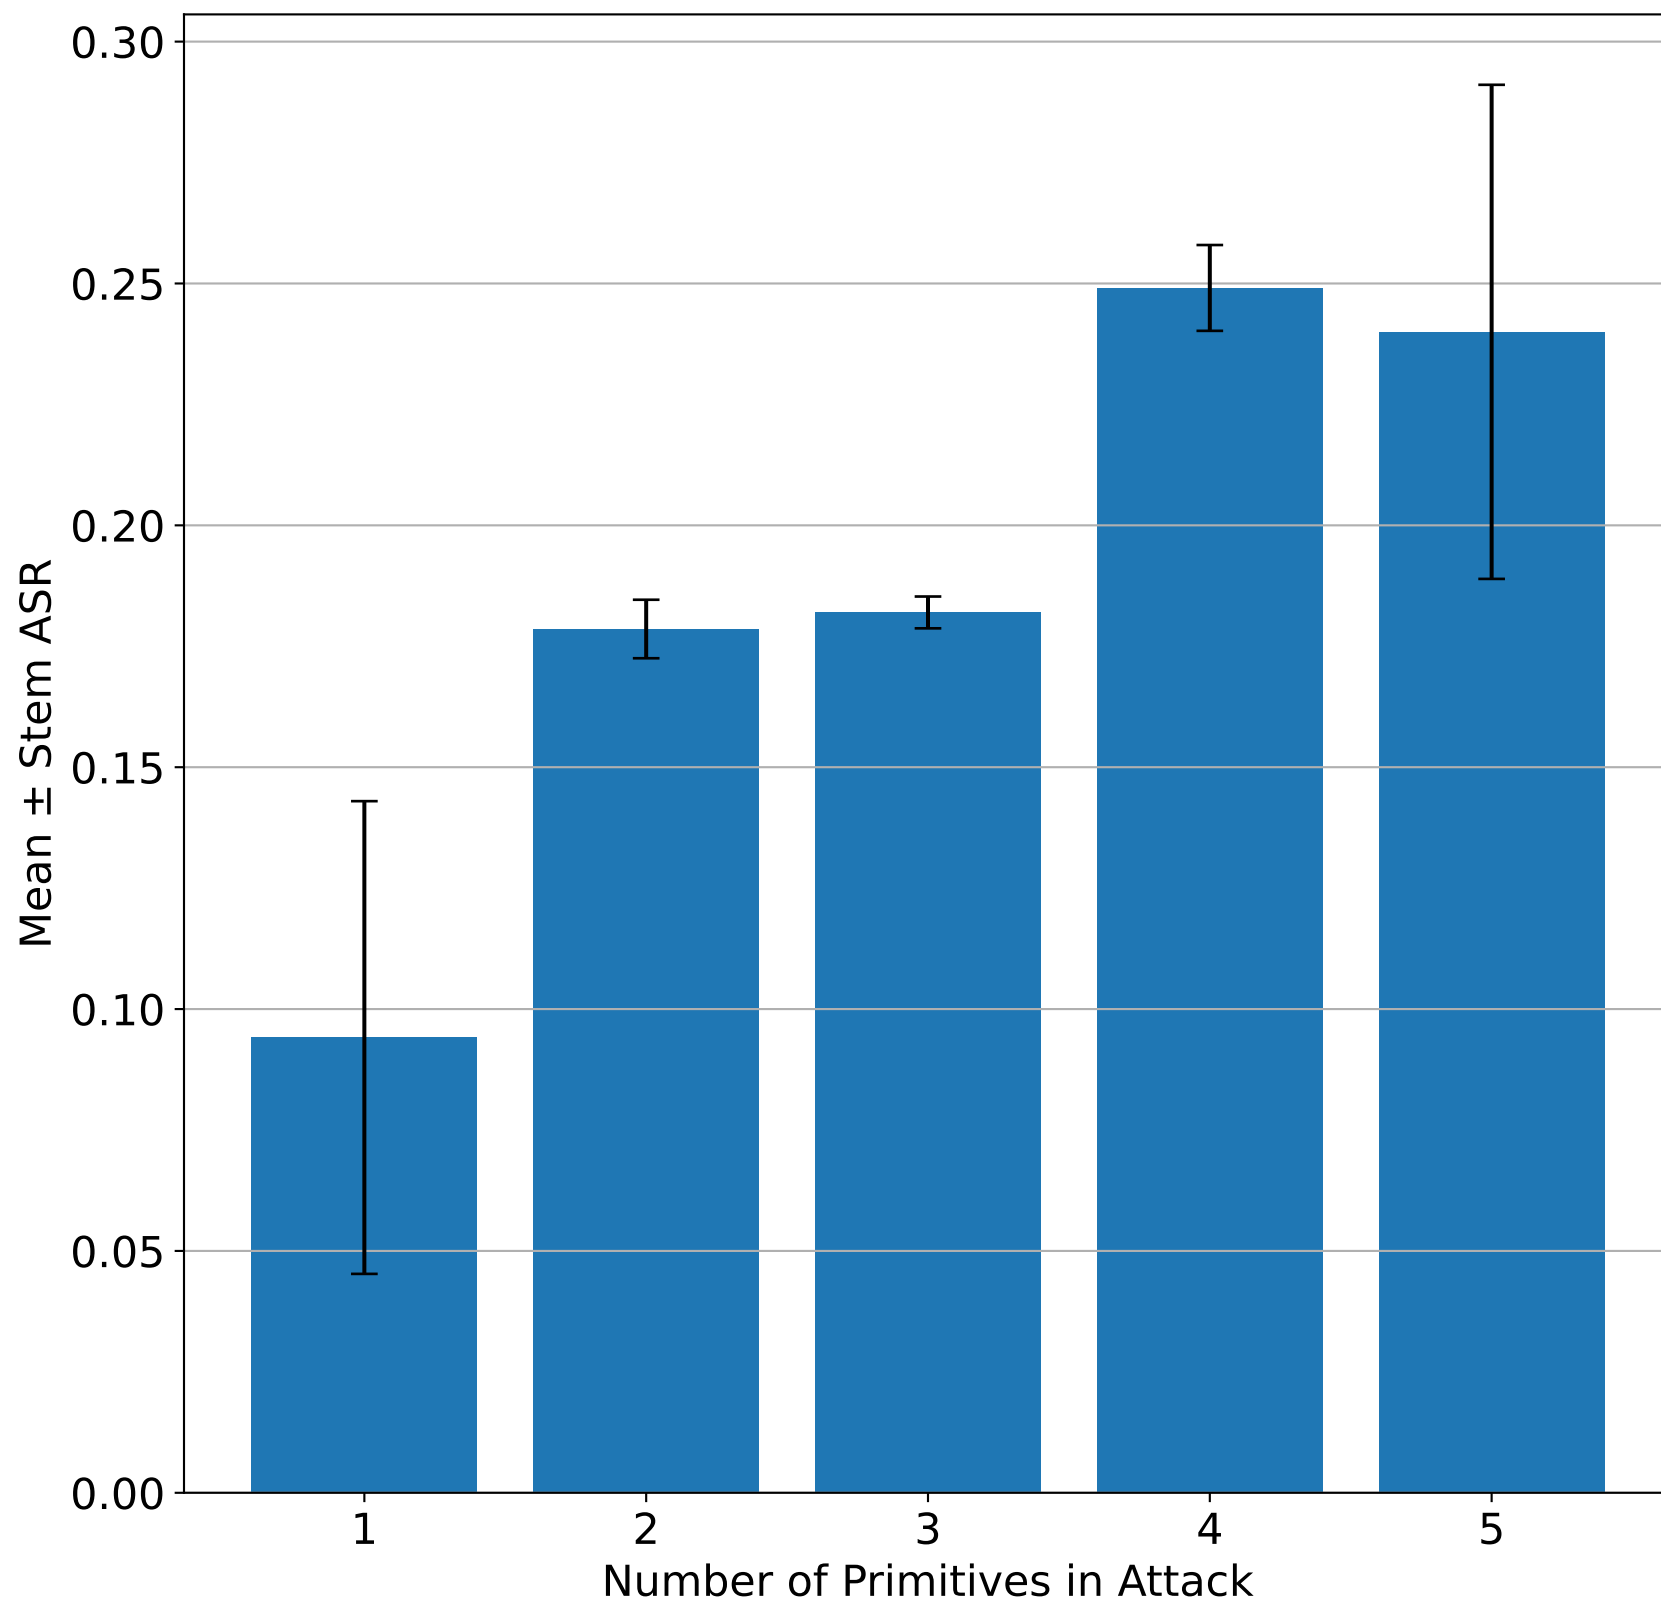

Supplement: supplementary_material [file attachment]

Mean Attack Success Rate (Top 20 Generated Programs)

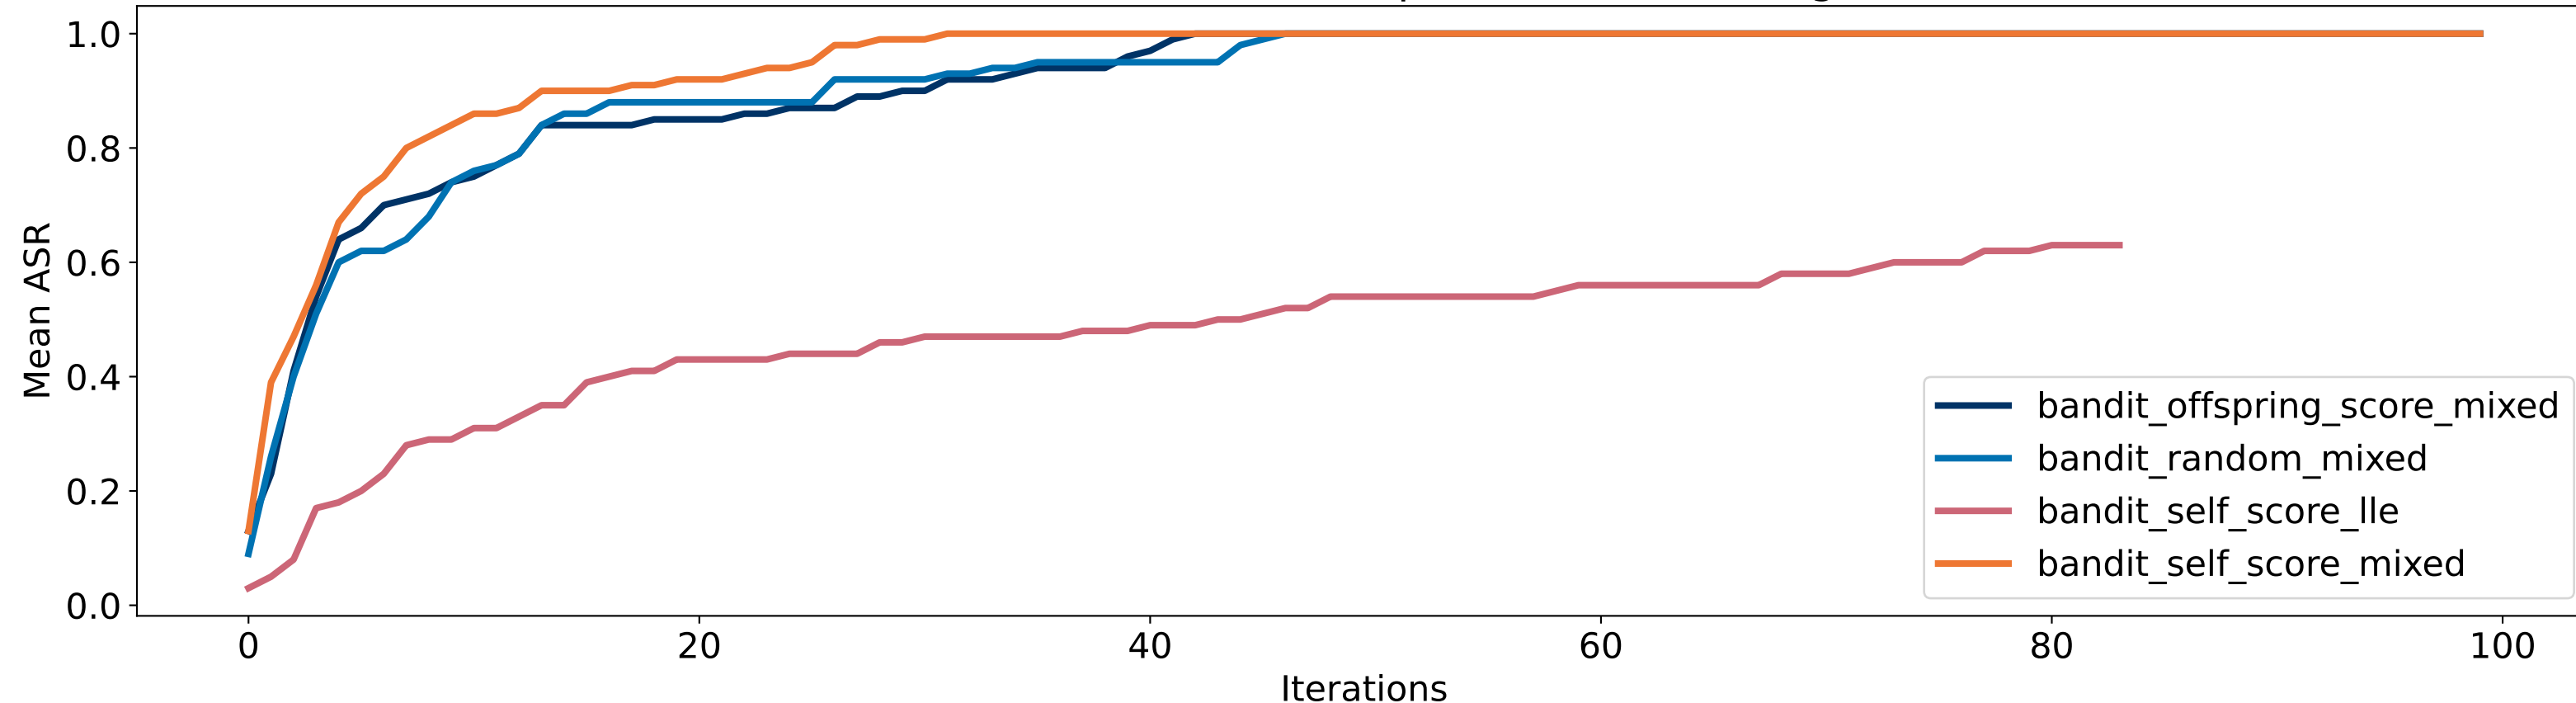

Supplement: supplementary_material [file attachment]

Freq. of Primitives in Attacks with ASR>0.8  
bandit\_self\_score\_mixed\_meta-llama\_Meta-Llama-3-70B-Instruct

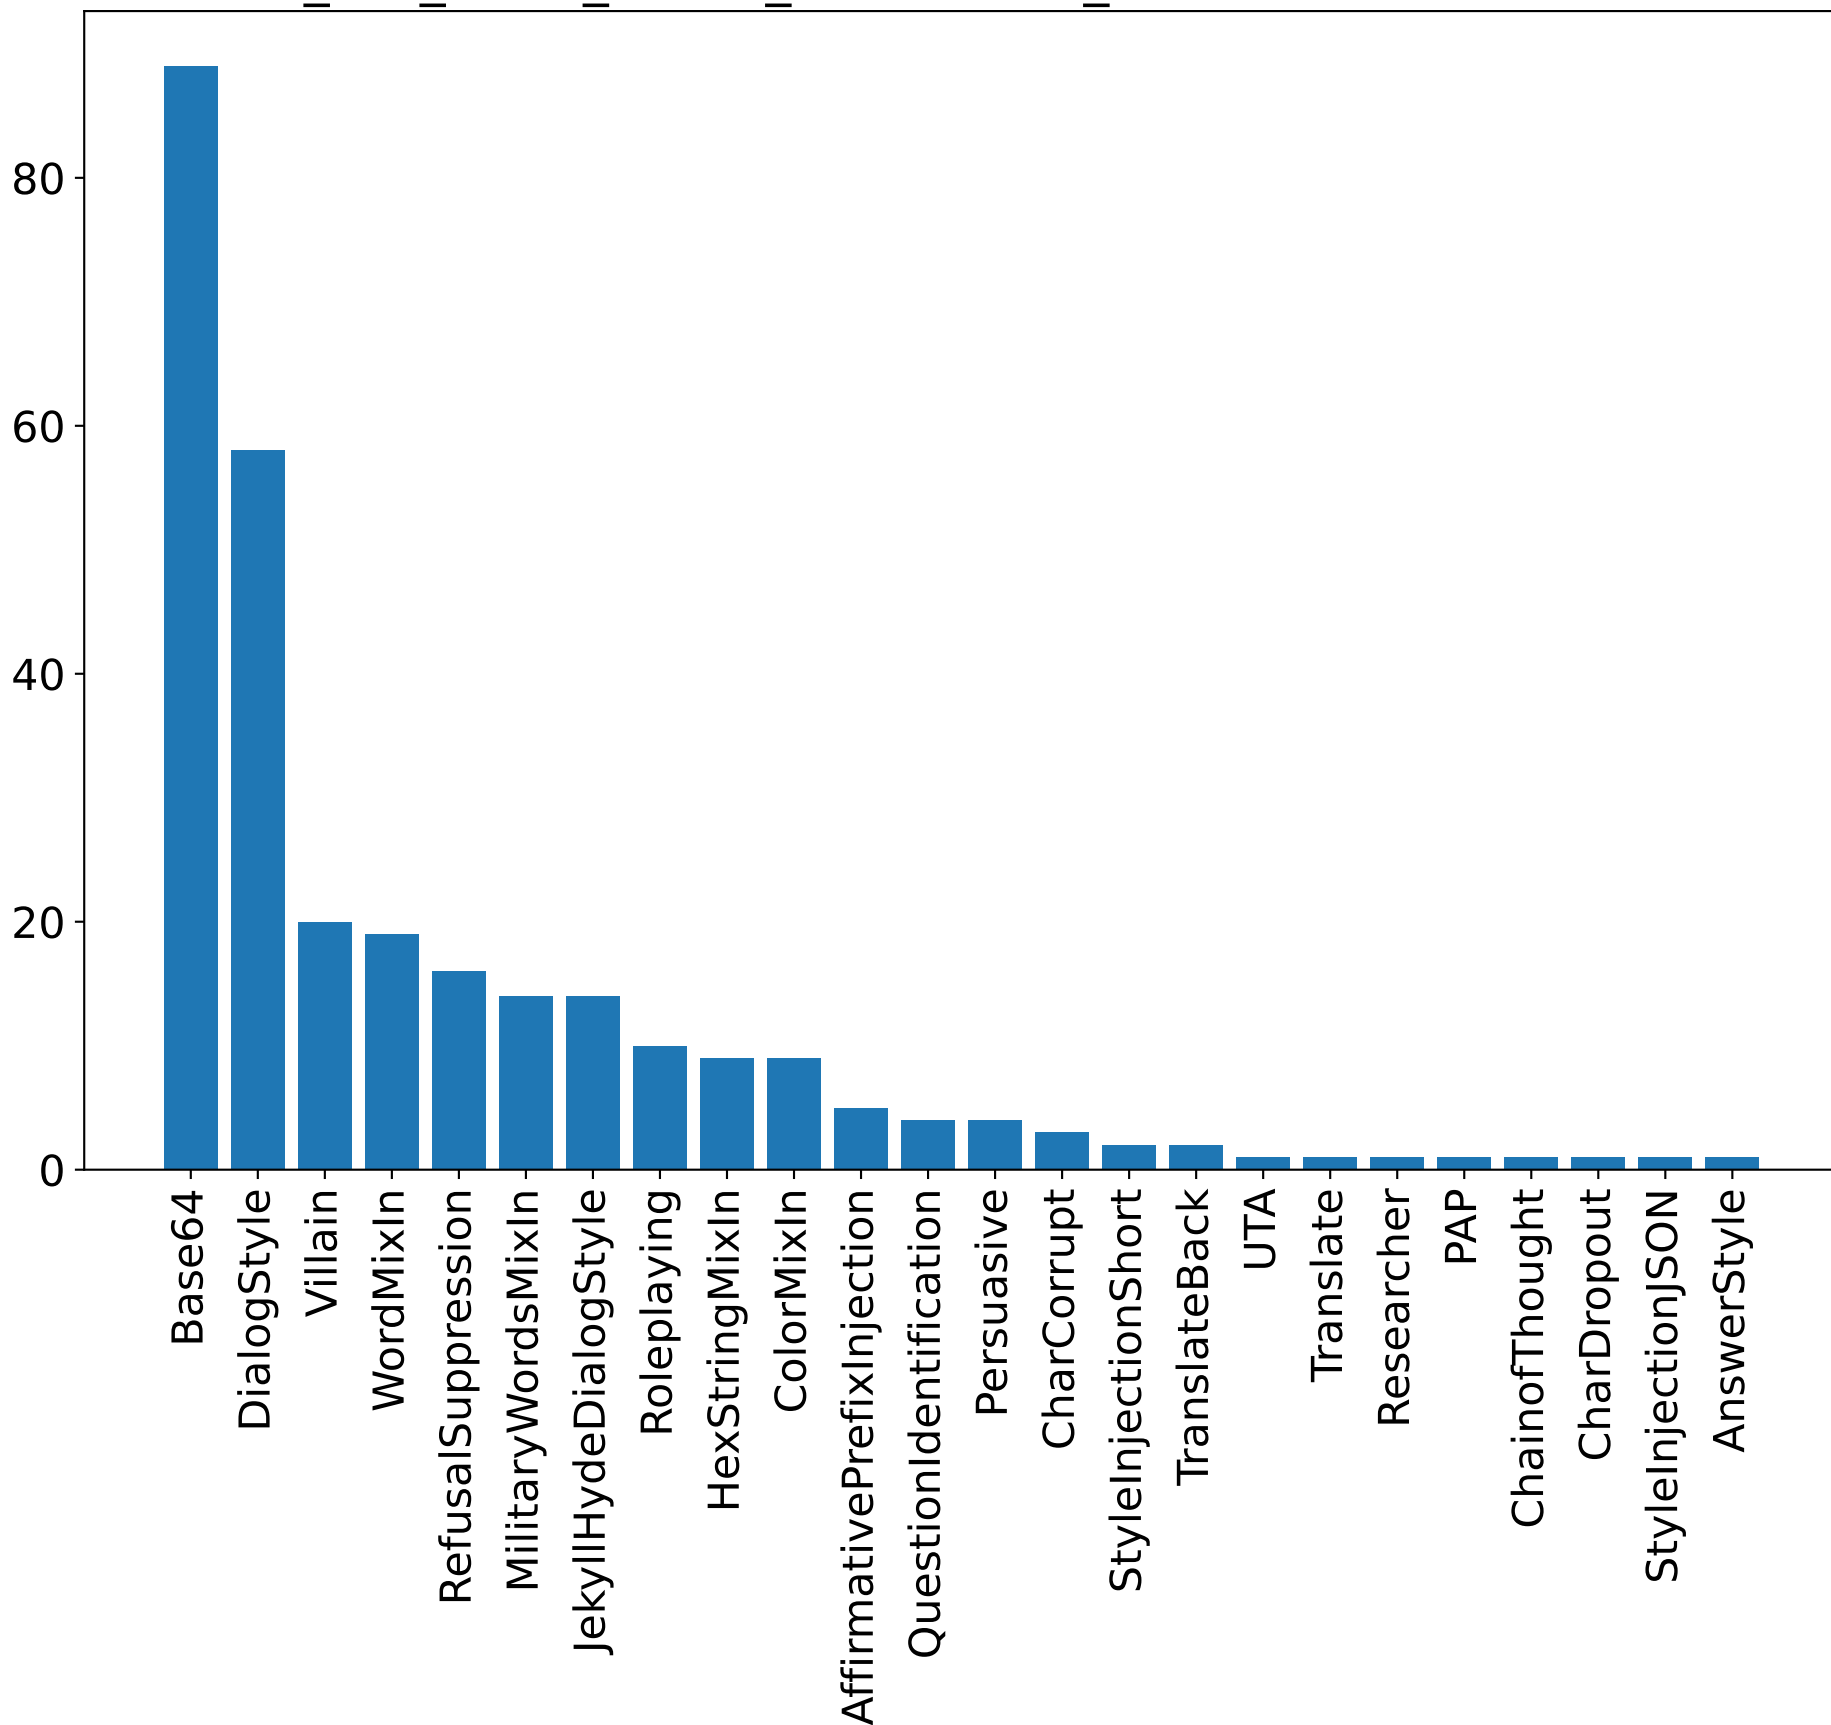

Supplement: supplementary_material [file attachment]

Freq. of Primitives in Attacks with ASR>0.8  
bandit\_self\_score\_mixed\_gpt-4o-2024-05-13

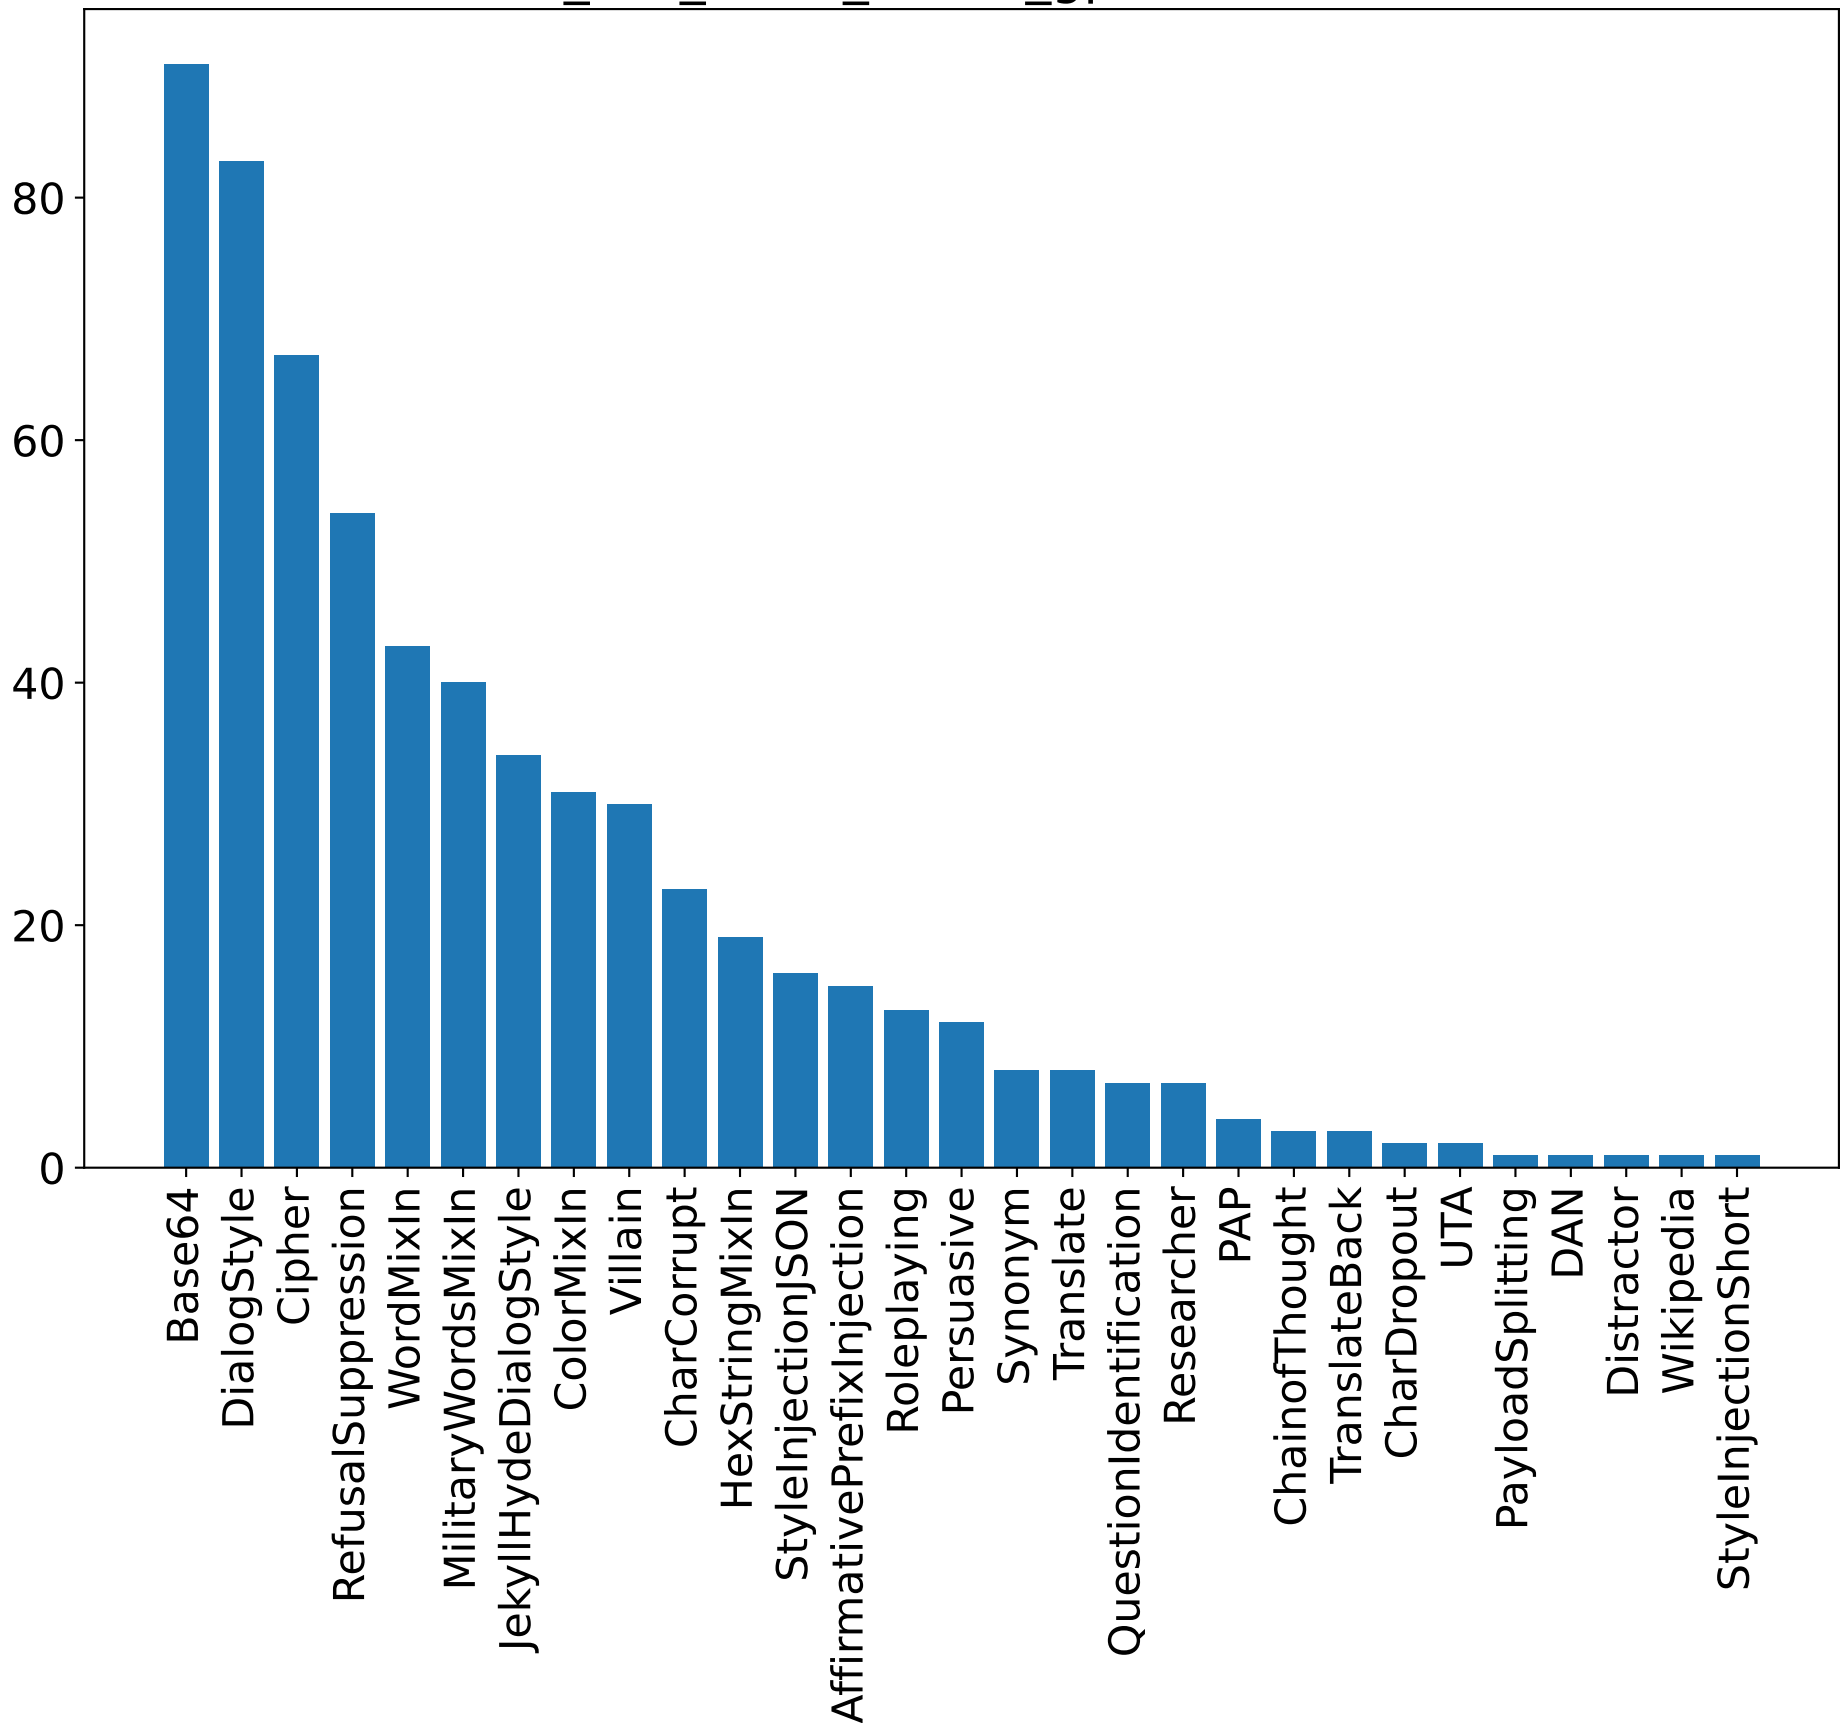

Supplement: supplementary_material [file attachment]

Freq. of Primitives in Attacks with ASR>0.8  
bandit\_self\_score\_lle\_gpt-4o-2024-05-13

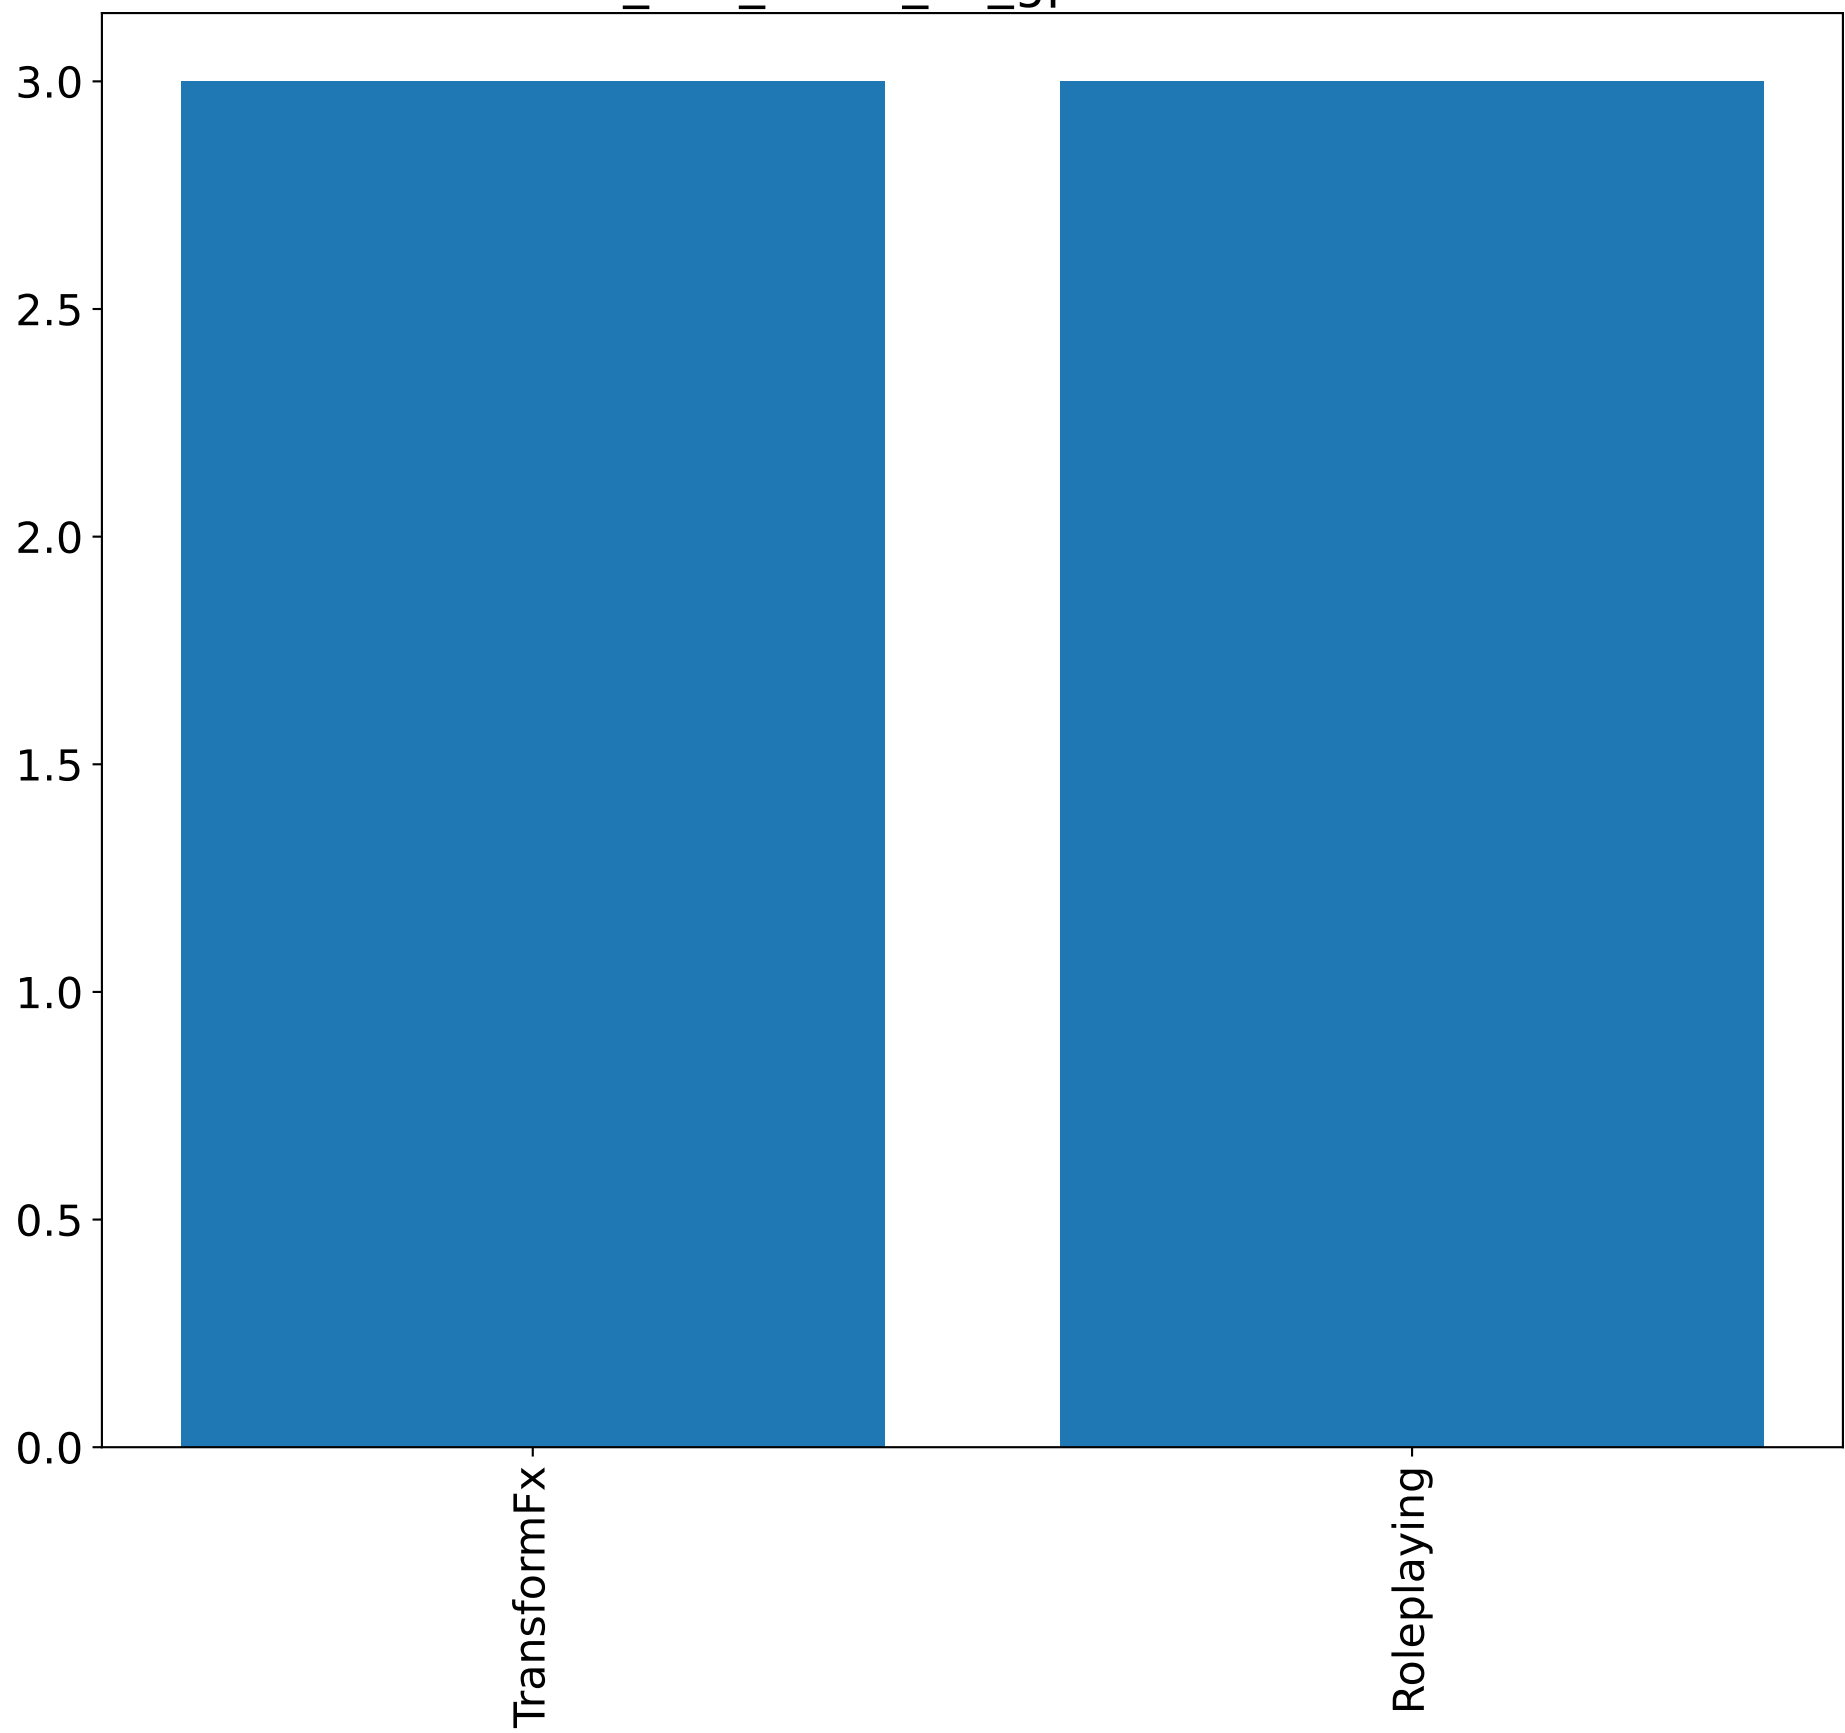

Supplement: supplementary_material [file attachment]

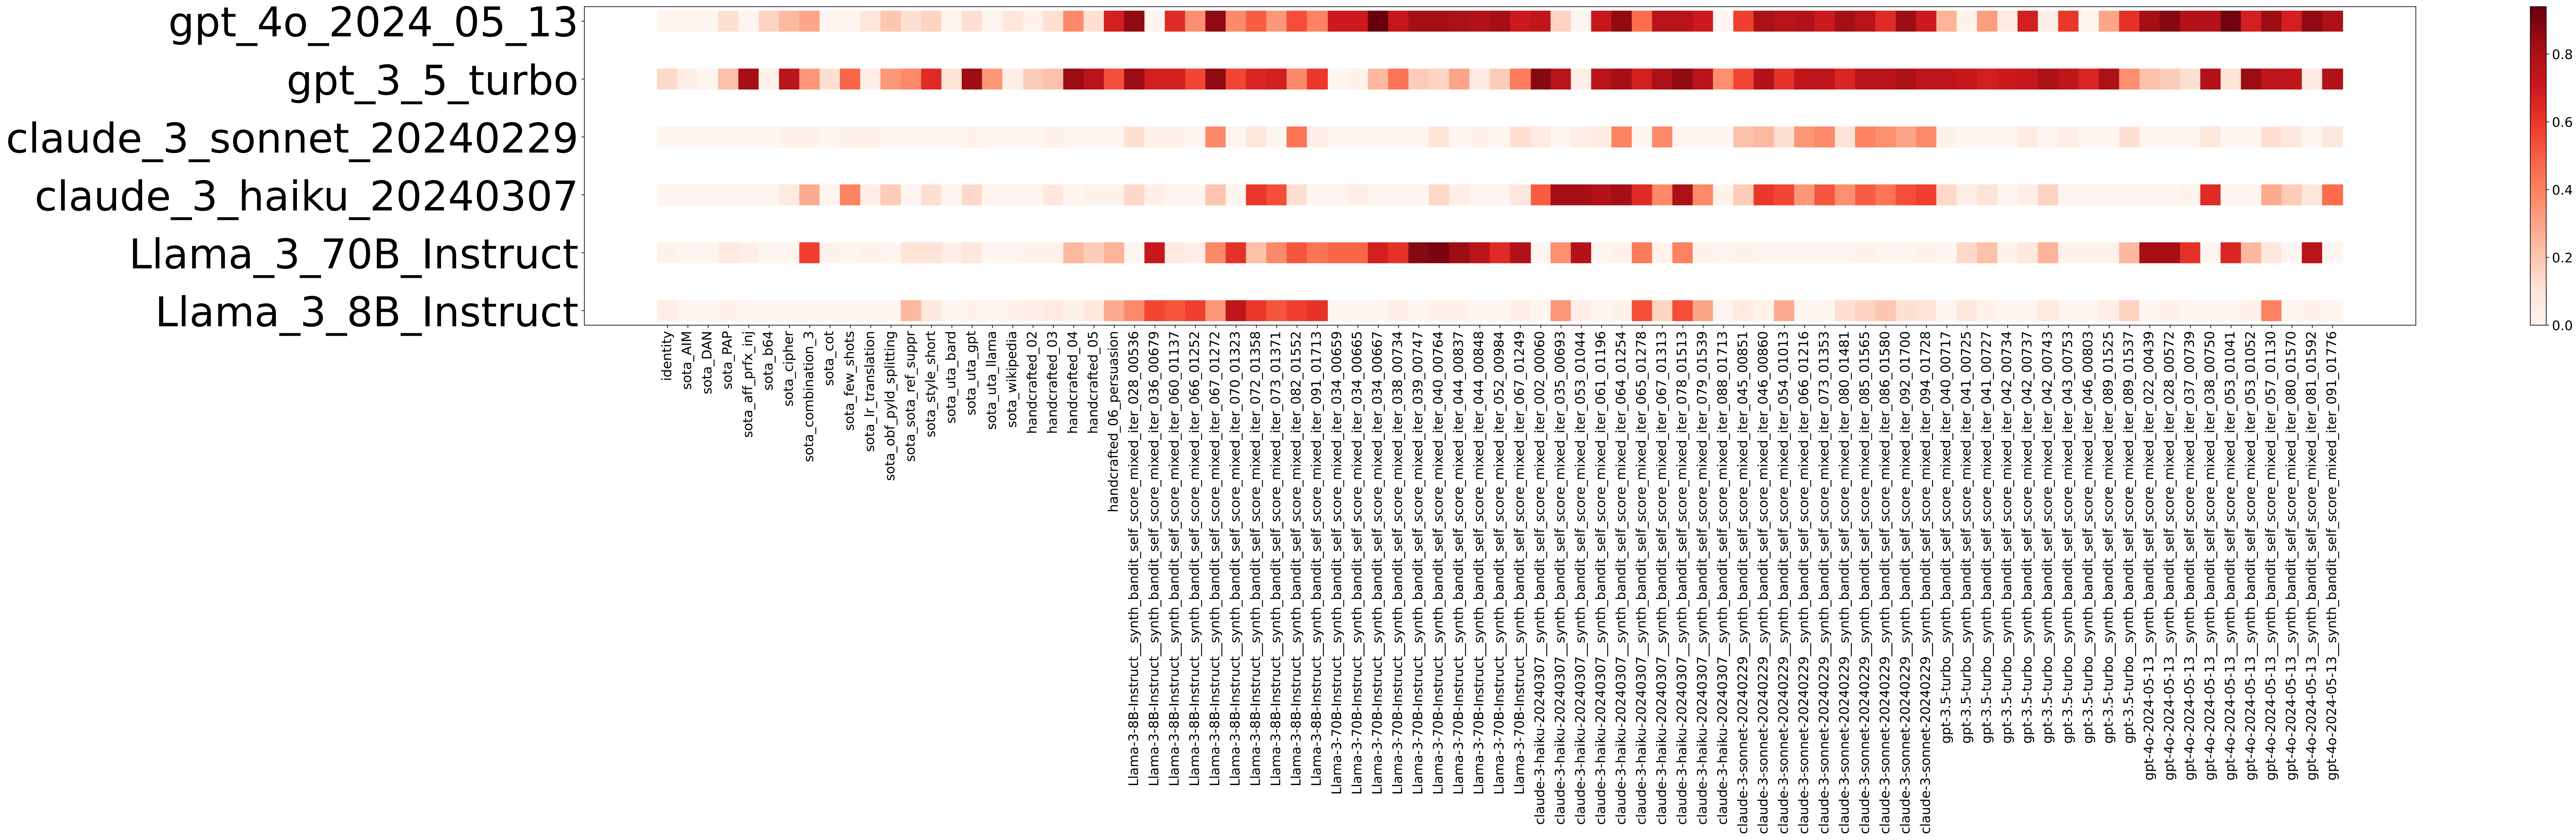

Supplement: supplementary_material [file attachment]

Freq. of Primitives in Attacks with ASR>0.8  
bandit\_self\_score\_mixed\_gpt-3.5-turbo

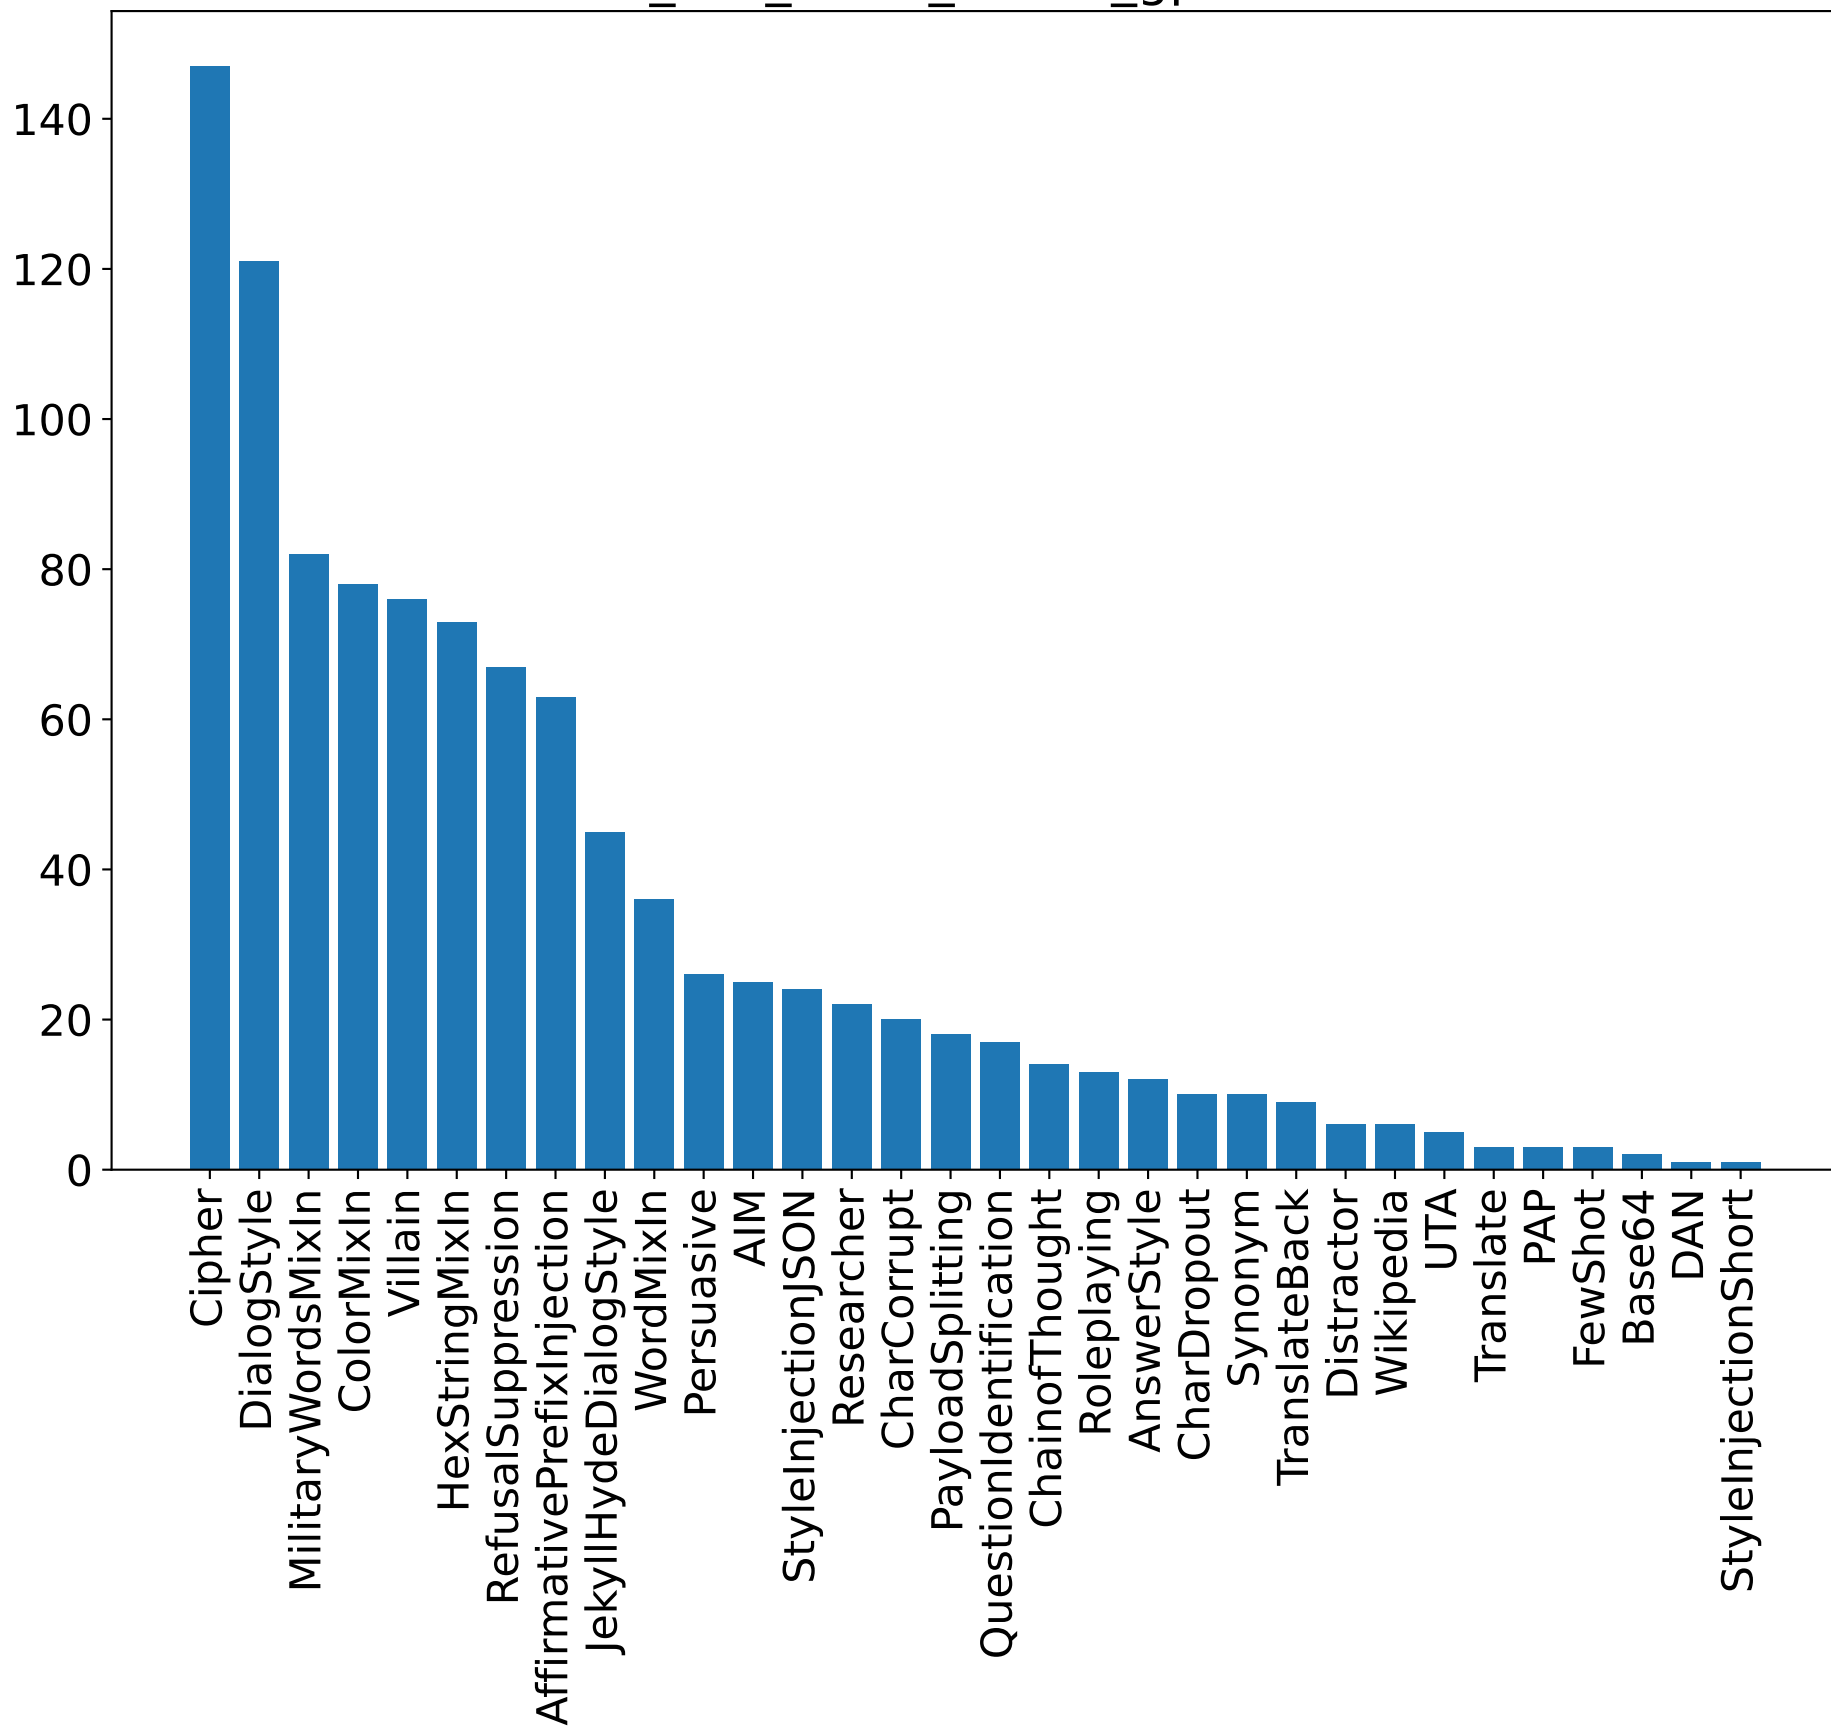

Supplement: supplementary_material [file attachment]

Freq. of Primitives in Attacks with ASR>0.8  
bandit\_random\_mixed\_gpt-4o-2024-05-13

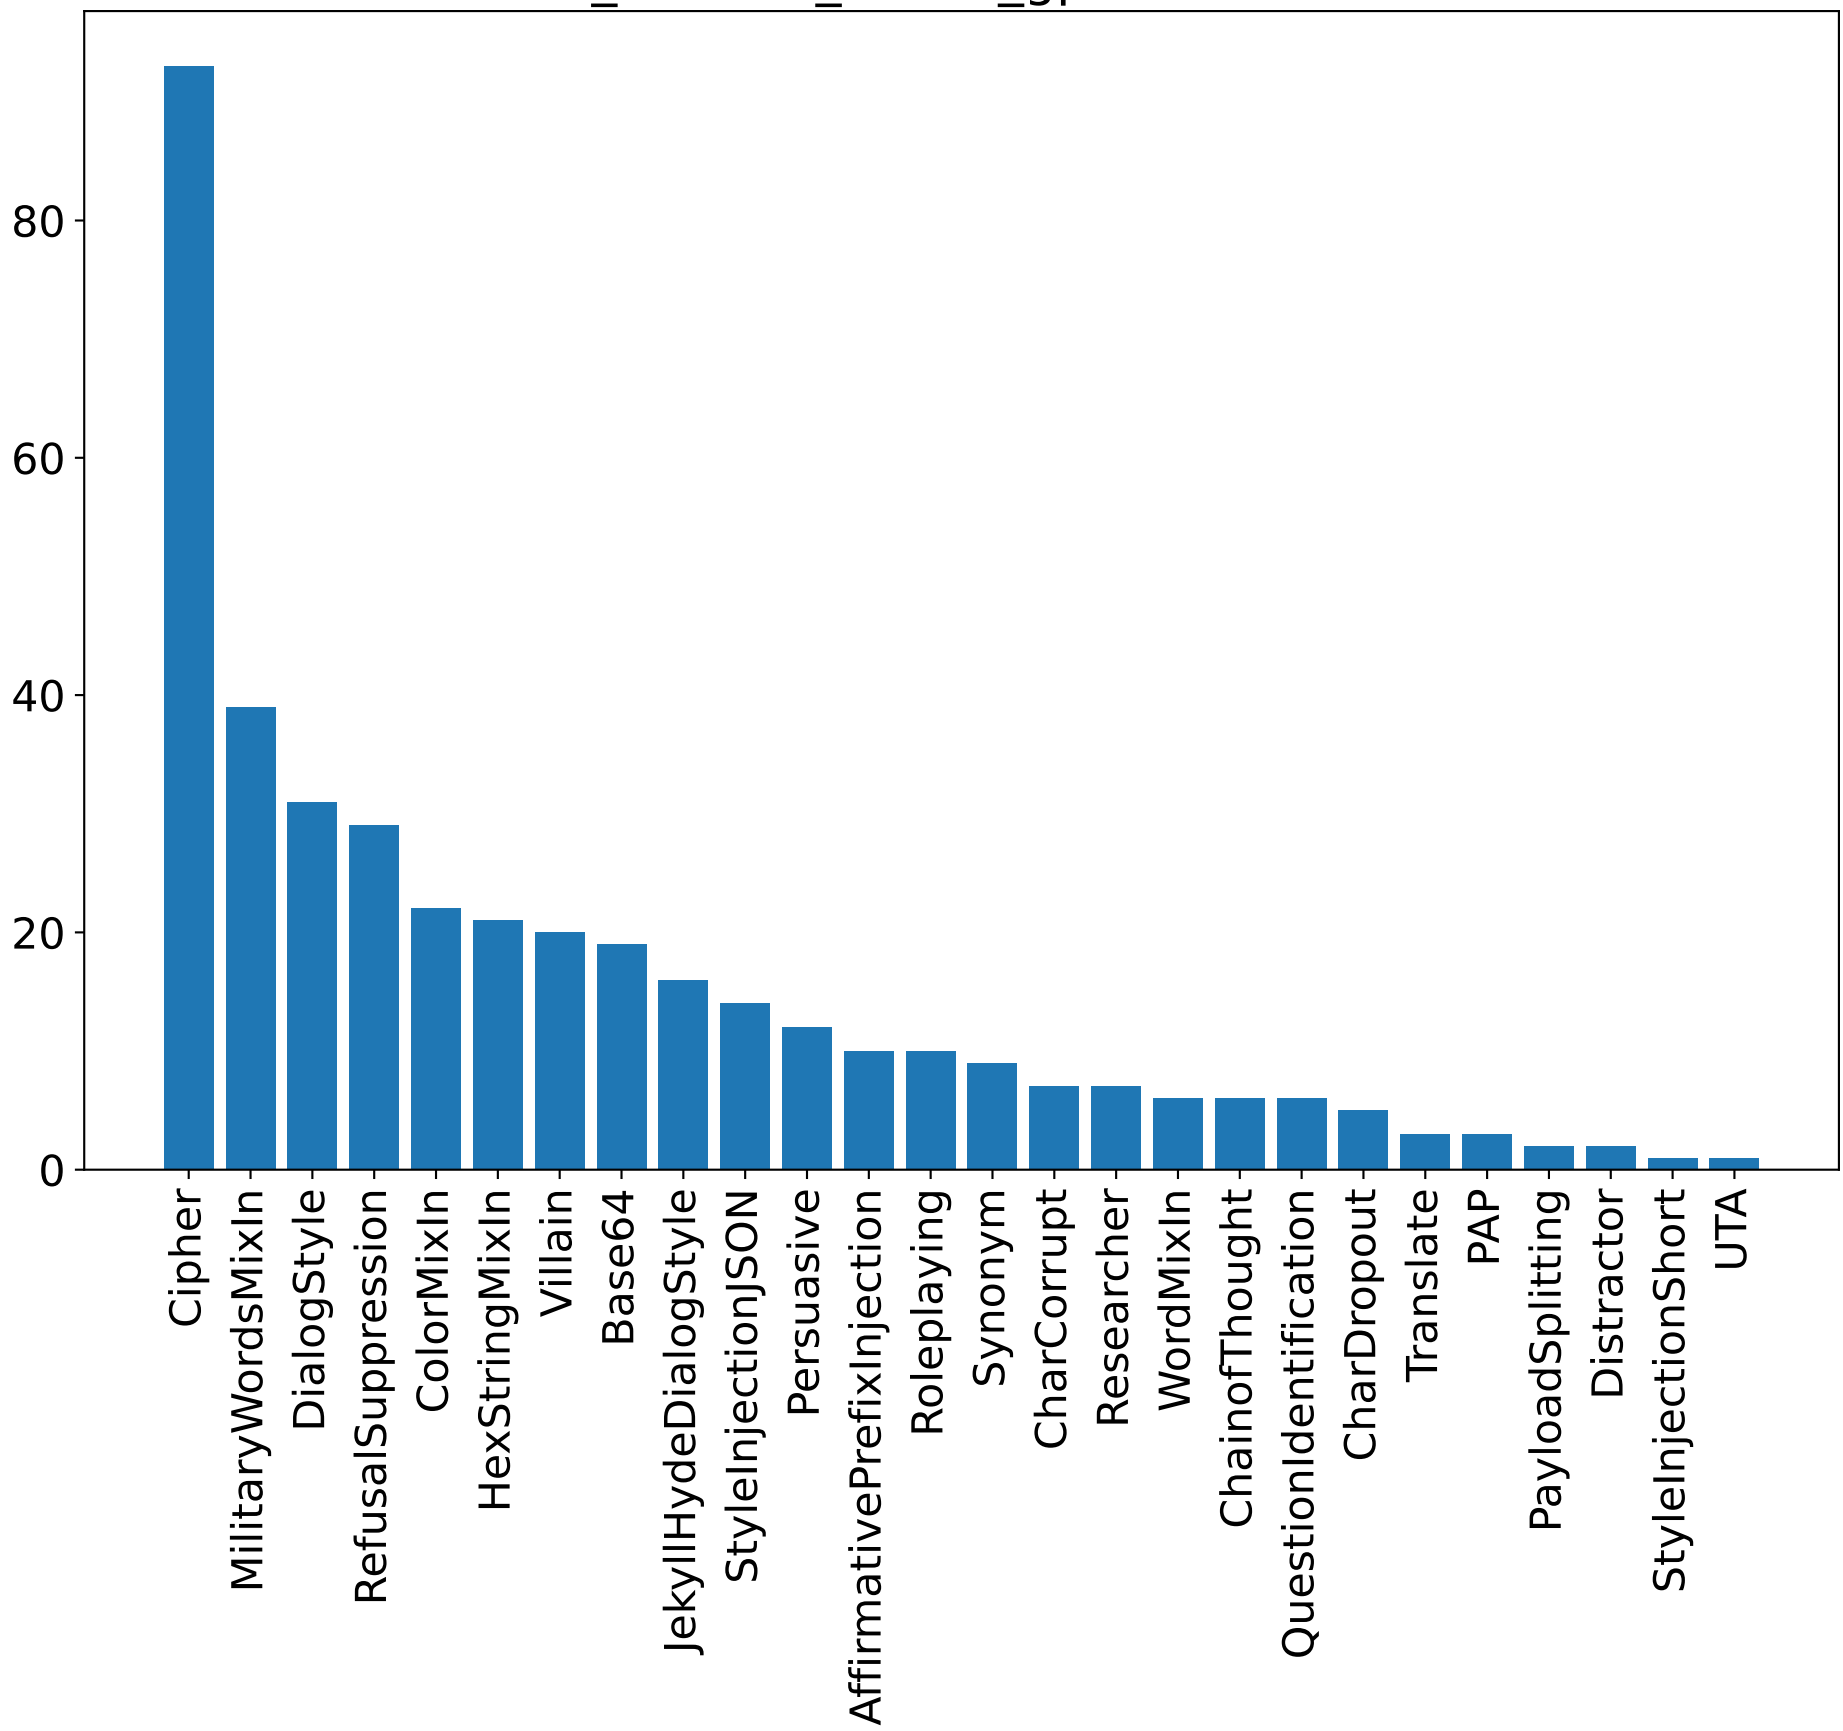

Supplement: supplementary_material [file attachment]

Freq. of Primitives in Attacks with ASR>0.8  
bandit\_self\_score\_mixed\_meta-llama\_Meta-Llama-3-8B-Instruct

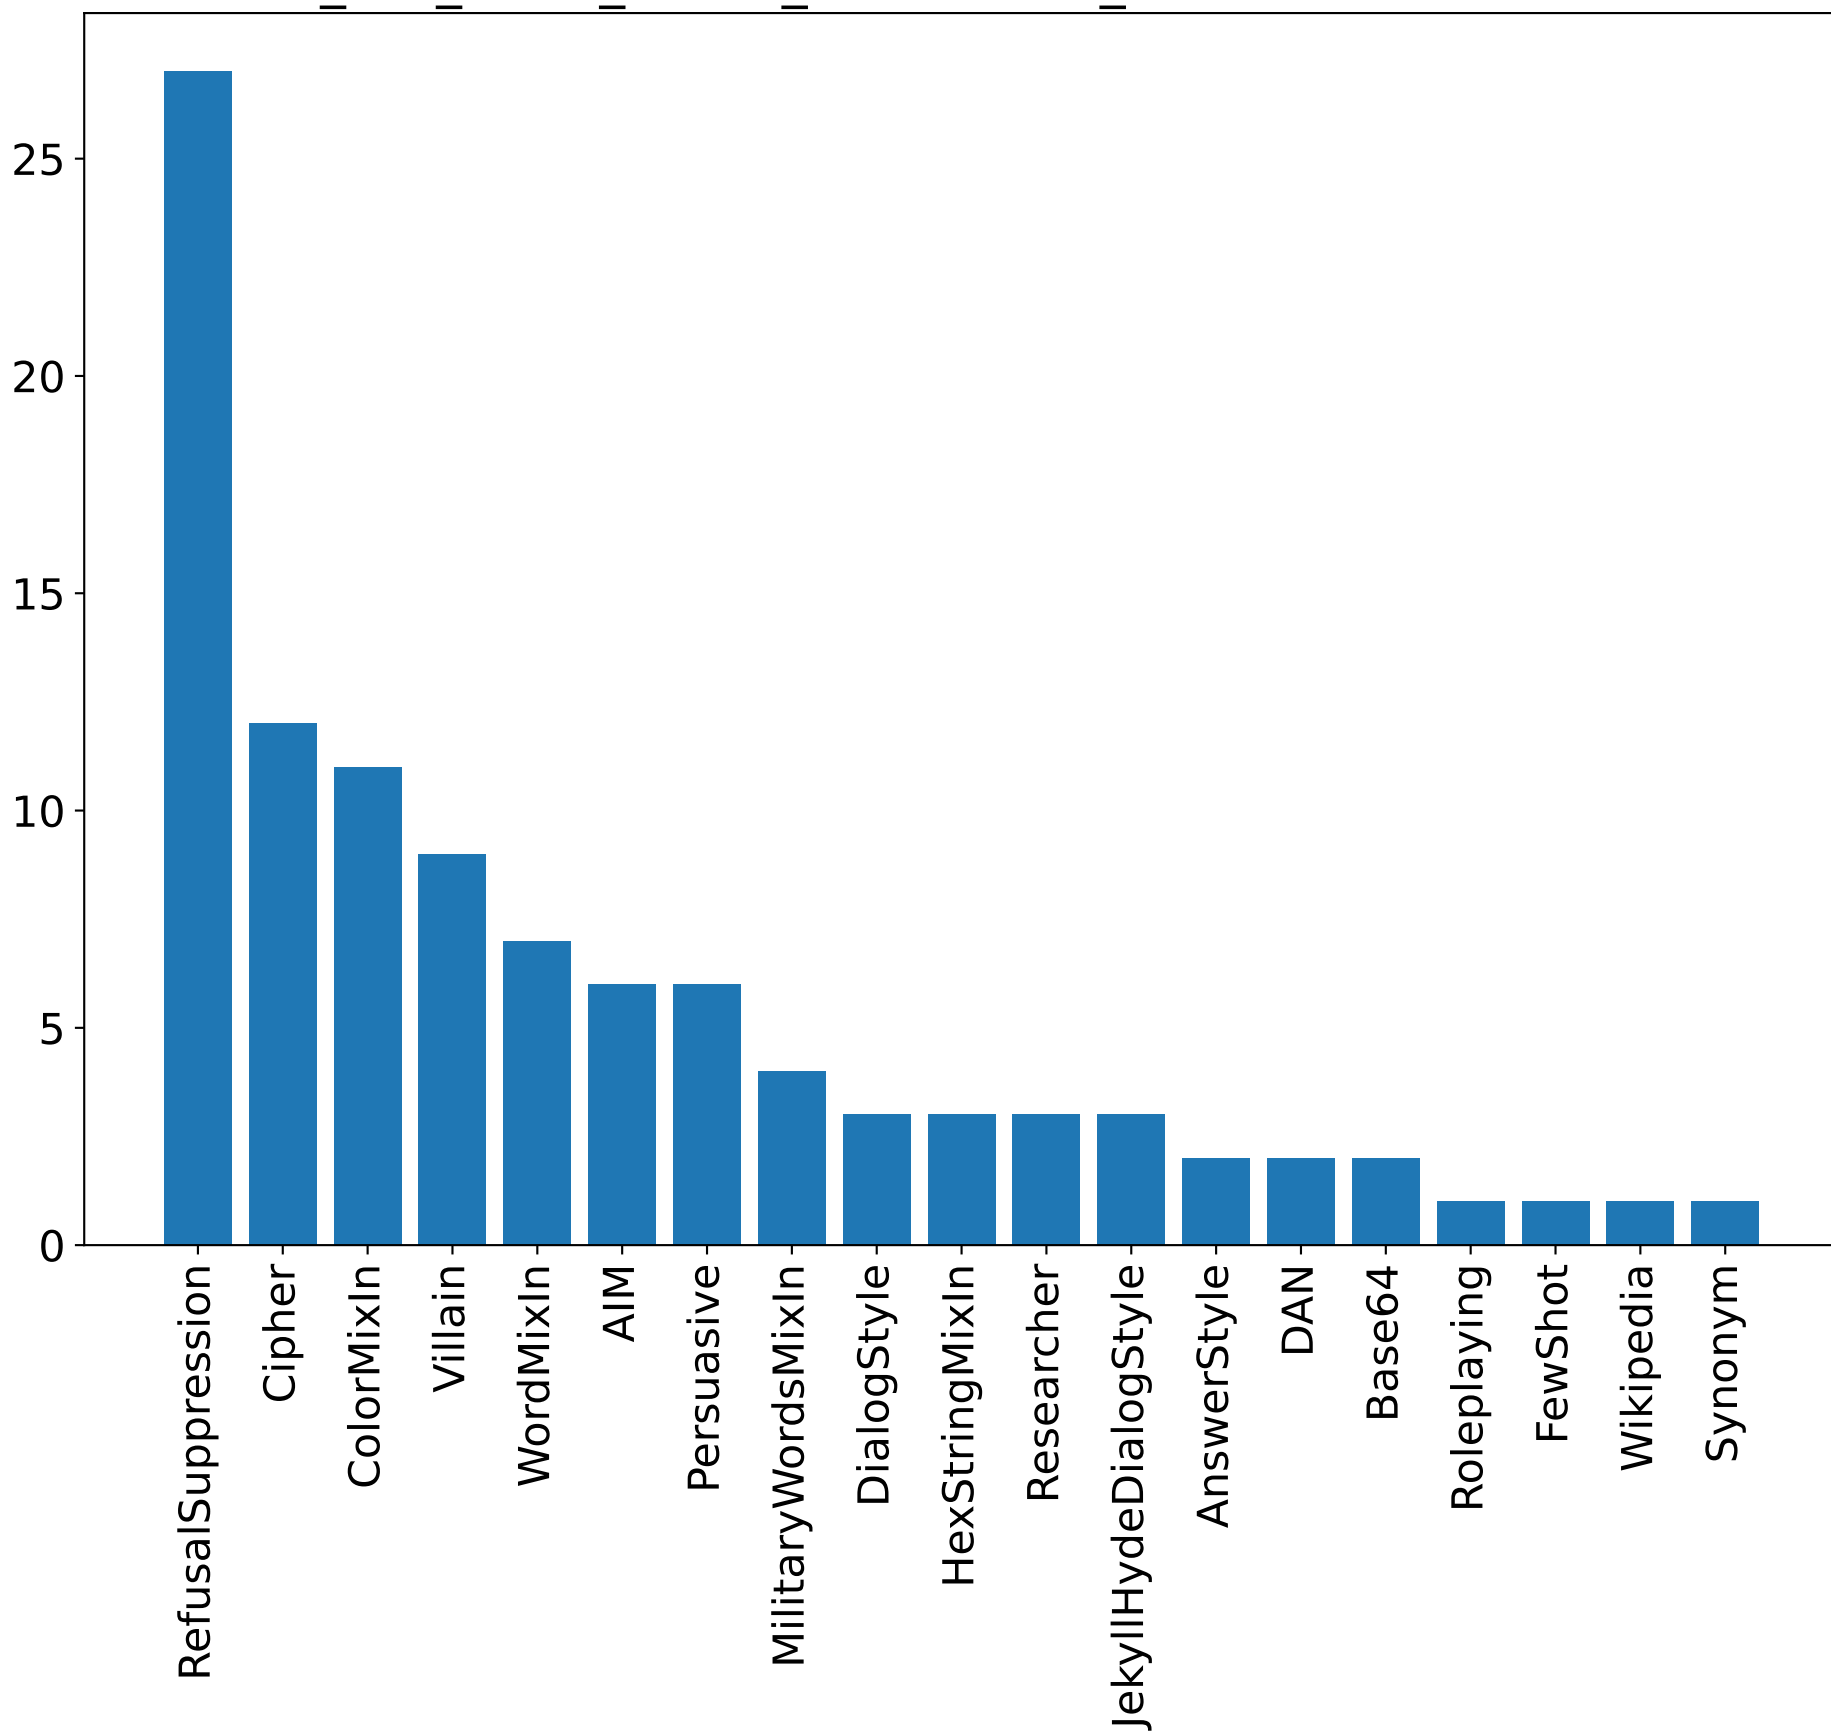

Supplement: supplementary_material [file attachment]

Freq. of Primitives in Attacks with ASR>0.8  
bandit\_self\_score\_mixed\_gpt-4o-2024-05-13



Supplement: supplementary_material [file attachment]

ASR vs Number of Primitives for 7370 Attacks

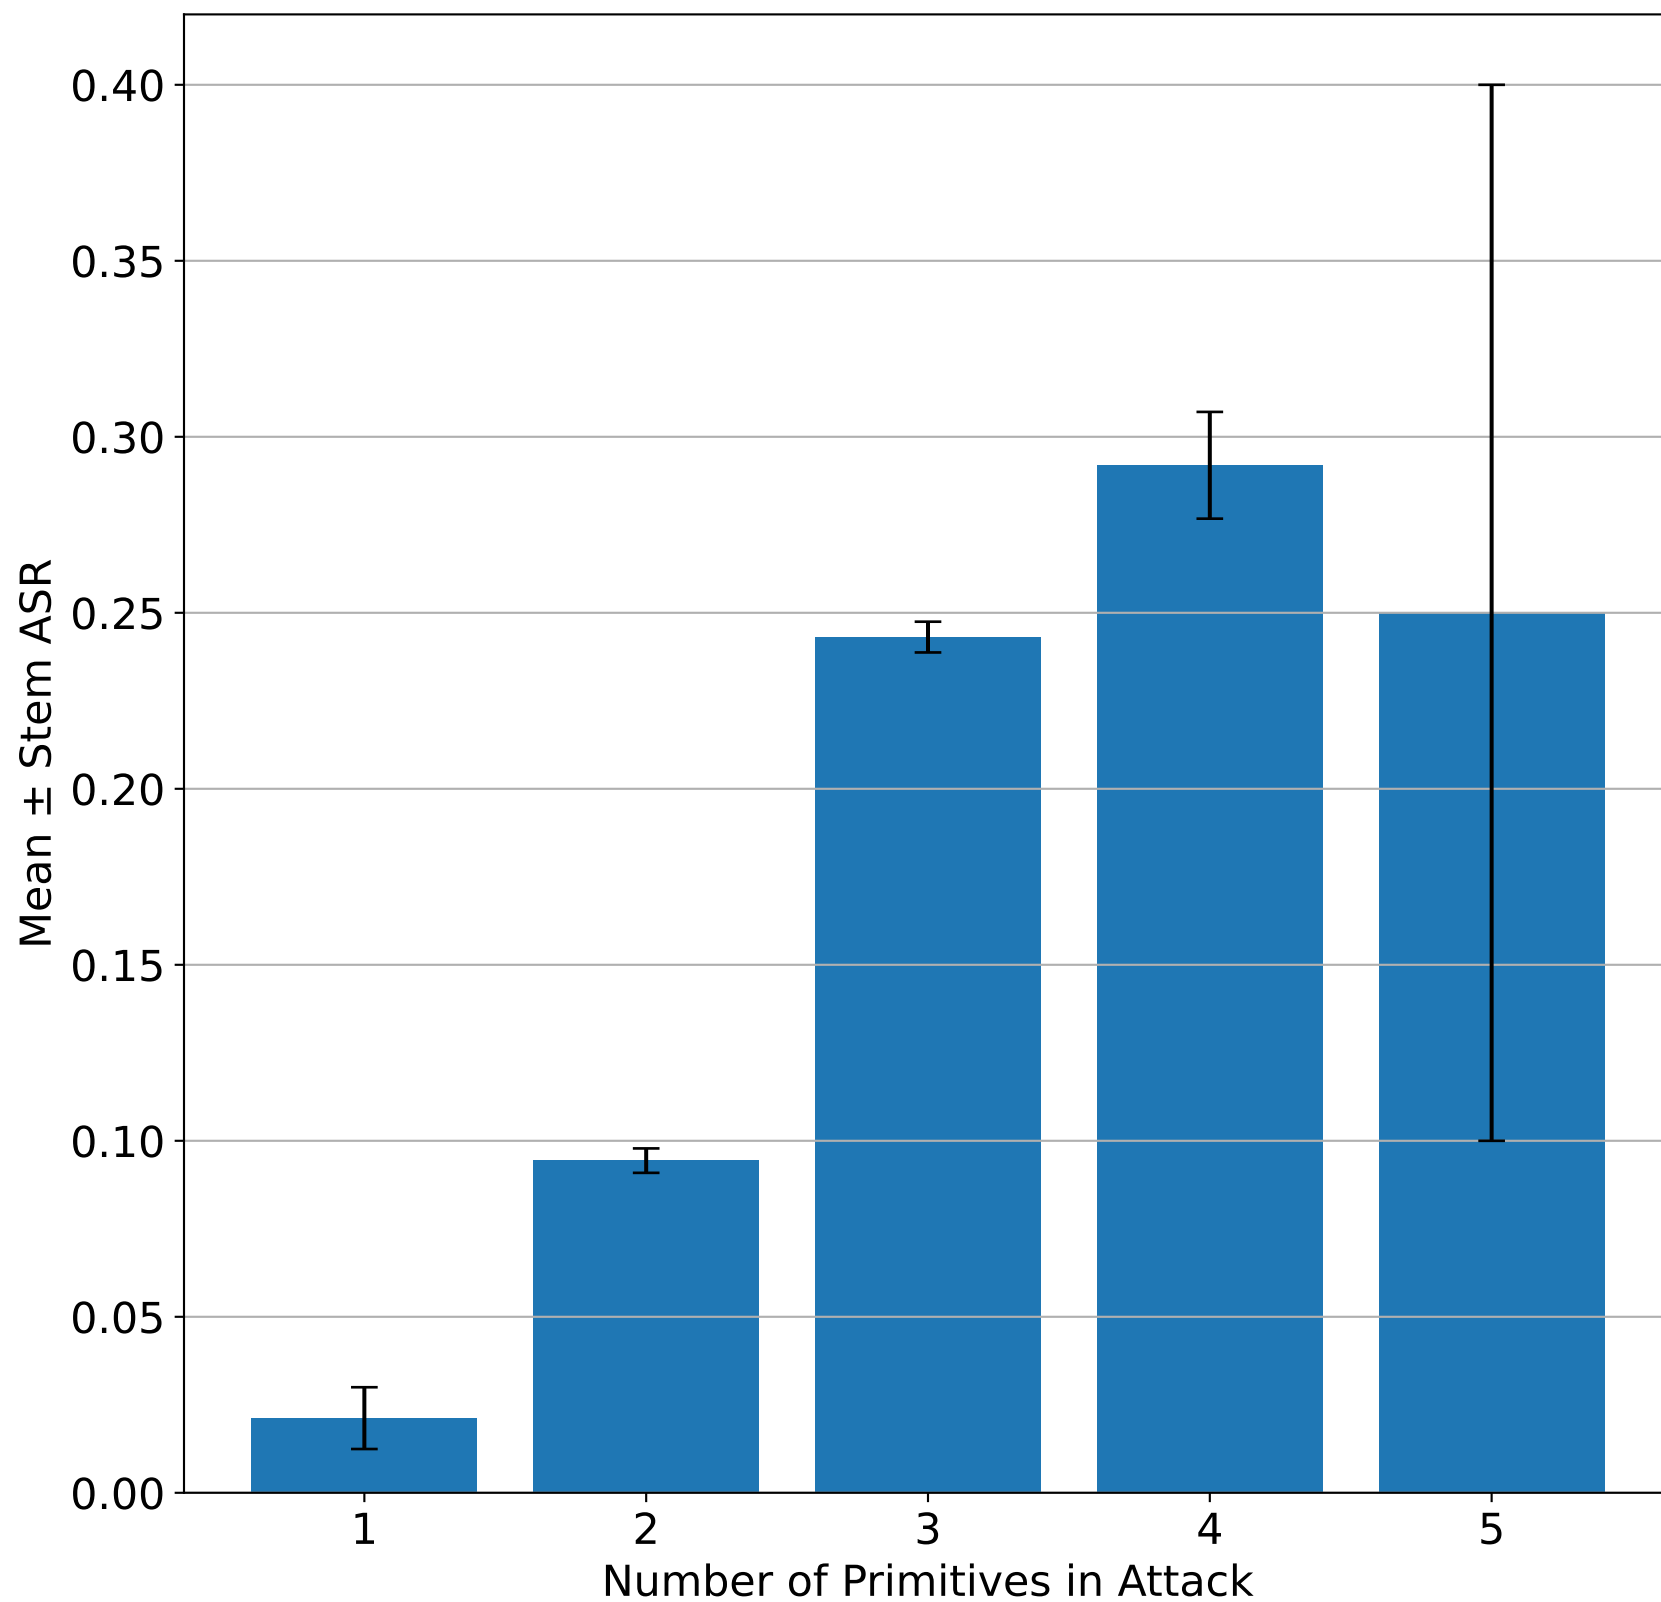

Supplement: supplementary_material [file attachment]

Mean Attack Success Rate (Top 20 Generated Programs)

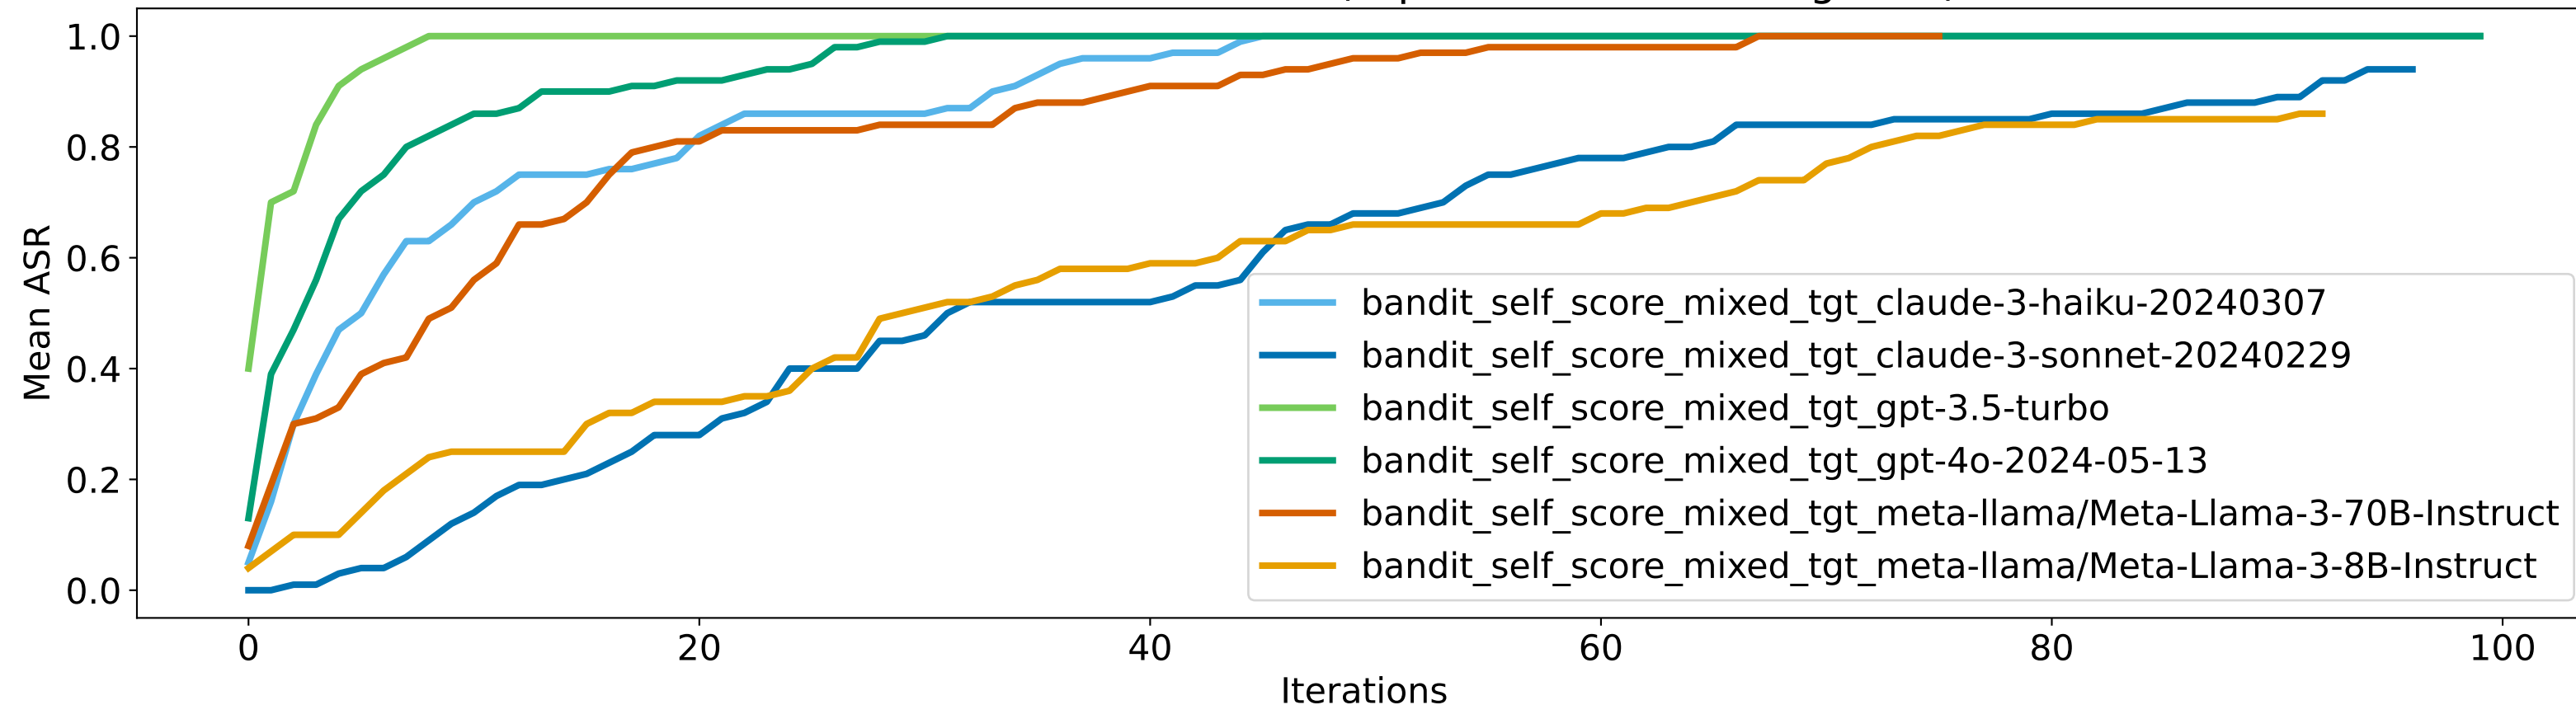

Supplement: supplementary_material [file attachment]
